# Supplementary material for: Syntheses and studies of electron/energy transfer of new dyads based on an unsymmetrical perylene diimide incorporating chelating 1,10-phenanthroline and its corresponding square-planar complexes with dichloroplatinum(ii) and dichloropalladium(ii )
Source: Royal Society of Chemistry journal article supplement (doi:10.1039/c8dt01135d), 2018-01-01
Supplement: c8dt01135d1.pdf [file c8dt01135d1.pdf]

Supporting Information

Syntheses and studies of electron/energy transfer of new dyads based on an unsymmetrical perylene diimide incorporating chelating 1,10-phenantroline and its corresponding square-planar complexes with dichloroplatinum(II) and dichloropalladium(II)

Sebile Işık Büyükekşi<sup>a</sup>, Ahmet Karatay<sup>b</sup>, Nursel Acar<sup>c</sup>, Betül Küçüköz<sup>b</sup>, Ayhan Elmalı<sup>b</sup> and Abdurrahman Şengül<sup>a\*</sup>

<sup>a</sup>*Department of Chemistry, Faculty of Arts and Sciences, Bülent Ecevit University, 67100 Zonguldak, Turkey*

<sup>b</sup>*Department of Engineering Physics, Faculty of Engineering, Ankara University, 06100 Beşevler, Ankara, Turkey*

<sup>c</sup>*Department of Chemistry, Faculty of Science, Ege University, 35100 Bornova, Izmir, Turkey*

---

\*Corresponding author. Tel: +90 372 2911126; fax: +90 372 257 4181.

E-mail address: [abdurrahmans2002@yahoo.co.uk](mailto:abdurrahmans2002@yahoo.co.uk) [sengul@beun.edu.tr](mailto:sengul@beun.edu.tr) (A. Sengul)

## Table of Contents

|                                                                                                                                                                                                                                                                                                                          |         |
|--------------------------------------------------------------------------------------------------------------------------------------------------------------------------------------------------------------------------------------------------------------------------------------------------------------------------|---------|
| The synthesis and characterizations of <b>PDI-3</b>                                                                                                                                                                                                                                                                      | S3-S6   |
| The FT-IR spectra of <b>1</b> , <b>2</b> and <b>3</b>                                                                                                                                                                                                                                                                    | S6-S7   |
| The MALDI-TOF spectra of <b>1</b> , <b>2</b> and <b>3</b>                                                                                                                                                                                                                                                                | S8-S9   |
| The <sup>1</sup> H NMR spectra of <b>1</b> , <b>2</b> and <b>3</b>                                                                                                                                                                                                                                                       | S9-S10  |
| The <sup>1</sup> H- <sup>1</sup> H COSY NMR spectra of <b>1</b> , <b>2</b> and <b>3</b>                                                                                                                                                                                                                                  | S11-S12 |
| <sup>1</sup> H chemical shifts (ppm) for compounds <b>1</b> , <b>2</b> and <b>3</b> in DMSO- <i>d</i> <sub>6</sub>                                                                                                                                                                                                       | S13     |
| The <sup>13</sup> C NMR spectra of <b>1</b> , <b>2</b> and <b>3</b>                                                                                                                                                                                                                                                      | S14-S15 |
| The <sup>1</sup> H- <sup>13</sup> C HSQC NMR spectra of <b>1</b> , <b>2</b> and <b>3</b>                                                                                                                                                                                                                                 | S16-S18 |
| The <sup>1</sup> H- <sup>13</sup> C HMBC NMR spectra of <b>1</b> , <b>2</b> and <b>3</b>                                                                                                                                                                                                                                 | S19-S21 |
| <sup>13</sup> C chemical shifts (ppm) for compounds <b>1</b> , <b>2</b> and <b>3</b> in DMSO- <i>d</i> <sub>6</sub>                                                                                                                                                                                                      | S22     |
| Electronic absorption and fluorescence excitation spectra of <b>1</b> , <b>2</b> and <b>3</b> in DMSO                                                                                                                                                                                                                    | S23-S25 |
| Electronic absorption and fluorescence excitation spectra of <b>1</b> , <b>2</b> and <b>3</b> in DCM                                                                                                                                                                                                                     | S26     |
| Schematic representation of the investigated molecules                                                                                                                                                                                                                                                                   | S27     |
| Dipole moments ( $\mu$ , Debye), sum of electronic energies and zero-point energies ( $E_{\text{elec}}+\text{ZPE}$ , Hartree), complexation energies ( $\Delta E_{\text{C}}$ ) and some dihedral angles of studied systems calculated with B3LYP functional using 6-31G(d,p) and LANL2DZ (for metals) basis sets in DCM. | S27     |
| Calculated IR spectra of <b>1</b> , <b>2</b> and <b>3</b> in gas phase.                                                                                                                                                                                                                                                  | S28     |
| Frontier molecular orbitals, their energies, and HOMO-LUMO energy gaps for the investigated molecules calculated at B3LYP functional using 6-31G(d,p) and LANL2DZ (for metals) basis sets in DCM.                                                                                                                        | S28     |
| Electronic transitions ( $\lambda_{\text{ex}}$ ), oscillator strengths ( $f$ ), transition dipole moments ( $\mu_{\text{tr}}$ ), excitation character, molecular orbitals and their % contributions of <b>1</b> , <b>2</b> and <b>3</b> at B3LYP functional using 6-31G(d,p) and LANL2DZ (for metals) basis sets in DCM. | S29-S31 |
| Some molecular orbitals of <b>1</b> , <b>2</b> and <b>3</b> in DCM.                                                                                                                                                                                                                                                      | S32-S34 |
| Charge distribution in compound <b>2</b> in DCM                                                                                                                                                                                                                                                                          | S35     |
| Ultrafast transient absorption spectra of <b>2</b> and <b>3</b> with different time delays at excited 590 nm femtosecond pulsed laser                                                                                                                                                                                    | S36     |

## Synthesis of PDI-3

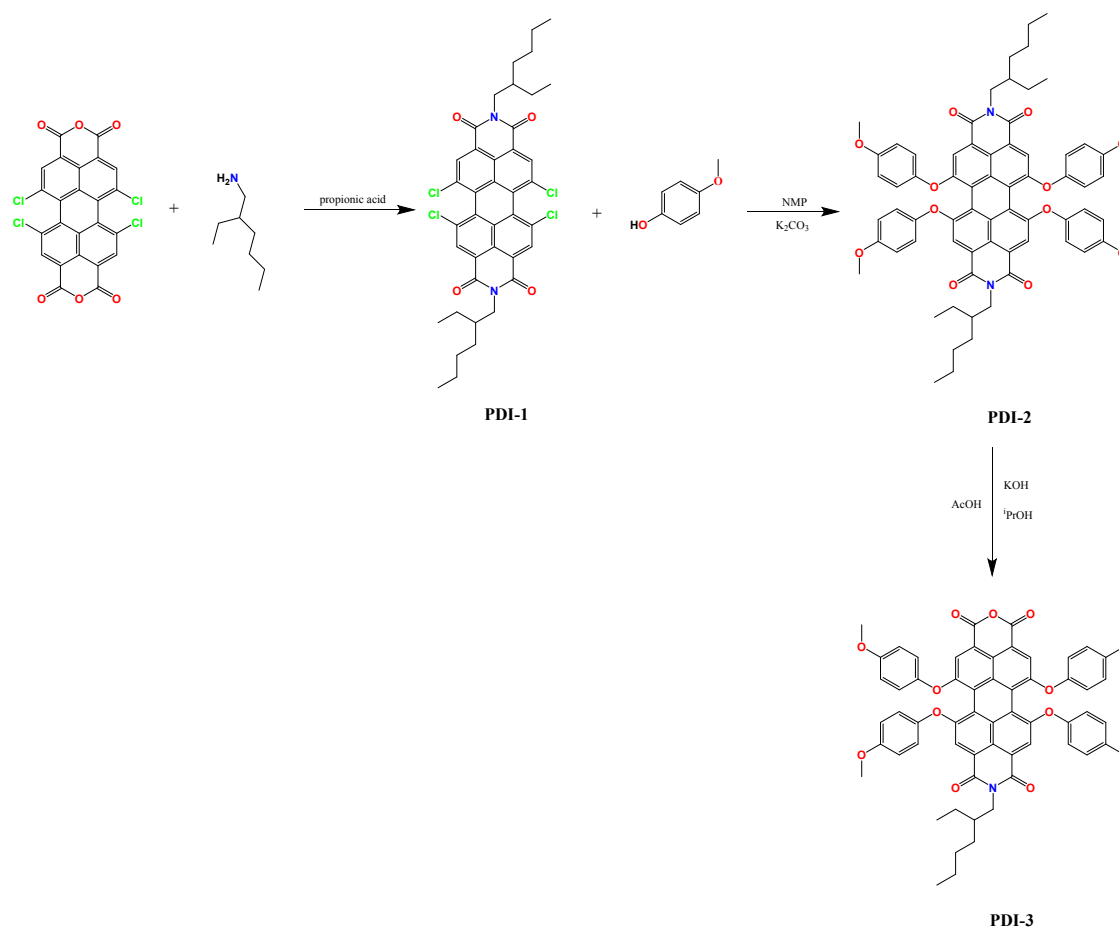

Scheme S1. Synthesis of PDI-3.

*N'*-(2-ethylhexyl)-1,6,7,12-tetrakis-(4-methoxyphenoxy)perylene-9,10-dicarboxylicimide-3,4-dicarboxylic anhydride (PDI-3)

*N,N'*-di(2-ethylhexyl)-1,6,7,12-tetrakis-(4-methoxyphenoxy)perylene-3,4,9,10-tetracarboxylic acid diimide (4.6 g, 1.49 mmol) and KOH (4.9 g) were heated under reflux for 70 min. in a mixture of isopropanol (48 mL) and H<sub>2</sub>O (6 mL). After cooling the reaction mixture to room temperature, it was stirred in acetic acid (10 mL) for 1h, H<sub>2</sub>O was added, and the resulting precipitate was filtered and dried under vacuum. The crude product was purified by column chromatography on silica gel using (DCM/EtAs – 100/1) as eluent. The product (0.29 g, 20%) was obtained as a purple solid. FT-IR Spectrum [(ATR)/cm<sup>-1</sup>]: 3075 (Ar-CH), 2956-2850 (CH), 1765 (C=O anhydride), 1735 (C=O anhydride), 1662 (C=O imide), 1589 (C=C), 1499, 1463, 1442, 1407, 1394, 1376, 1339, 1285, 1246, 1224, 1197 (C-O-C), 1179 (C-O-C), 1138, 1118, 1102, 1072, 1132, 1007, 946, 905, 873, 828, 796, 758, 742, 730, 705, 669, 650. MALDI-TOF (*m/z*): Calculated: 992.03; Found: 992.4 [M]<sup>+</sup>. <sup>1</sup>H NMR (600 MHz, CDCl<sub>3</sub>) δ<sub>ppm</sub>: δ = 8.11 (s, 2H, H<sub>P1</sub>), 8.08 (s, 2H, H<sub>P1'</sub>), 6.92 (d, 8H, H<sub>P2</sub>), 6.83 (d, 8H, H<sub>P3</sub>), 4.03 (m, 2H, H<sub>H1</sub>), 3.81 (s, 12H, H<sub>P4</sub>), 1.54 (t, 1H, H<sub>H2</sub>), 1.31-1.25 (m, 8H, H<sub>H3</sub>, H<sub>5</sub>, H<sub>6</sub>, H<sub>7</sub>), 0.92-0.86 (m, 6H, H<sub>H4</sub>, H<sub>8</sub>). <sup>13</sup>C NMR (DEPT, 600 MHz, CDCl<sub>3</sub>) δ<sub>ppm</sub>: (C) 163.633, 157.273, 156.905, 156.844, 148.170, 123.066, 121.403, 119.043, 117.939 (CH) 121.533, 121.449, 120.529, 118.782, 115.311, 115.265, 38.061 (CH<sub>2</sub>) 44.413, 30.796, 29.685, 24.053, 23.033 (CH<sub>3</sub>) 55.693, 55.678, 16.888, 10.581.

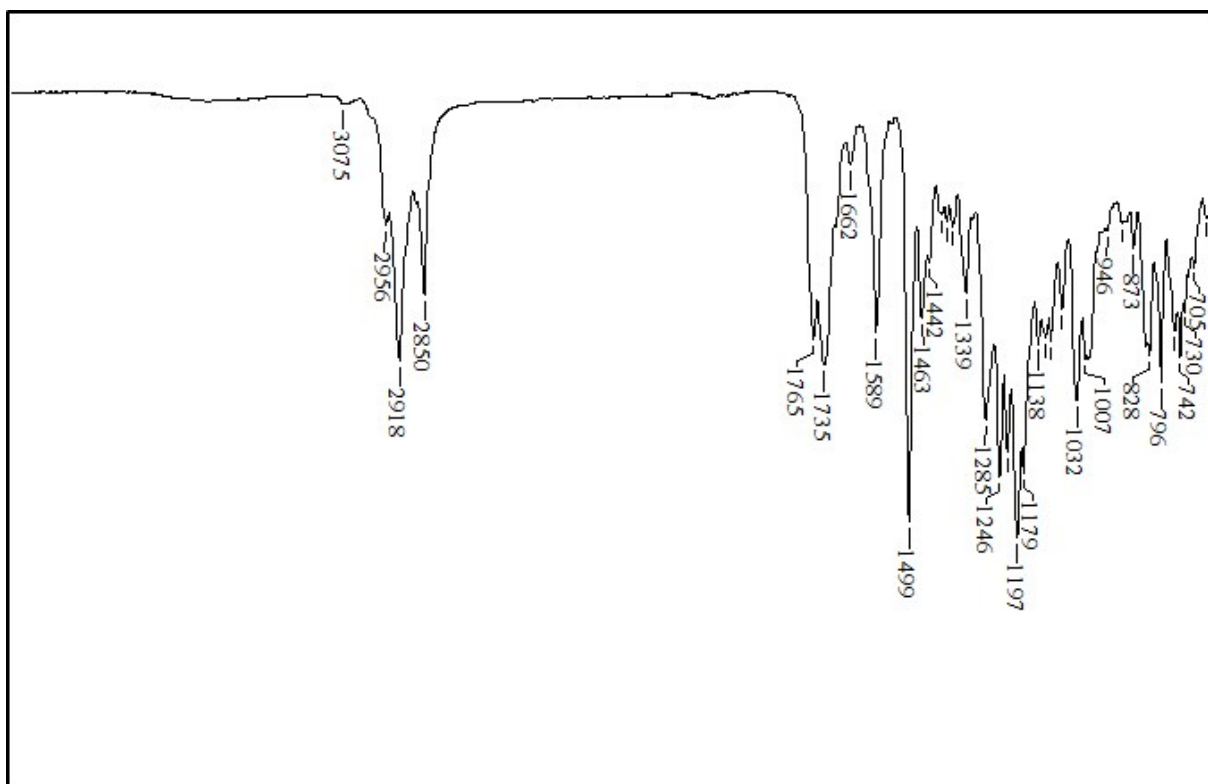

Figure S1. FT-IR spectrum of PDI-3

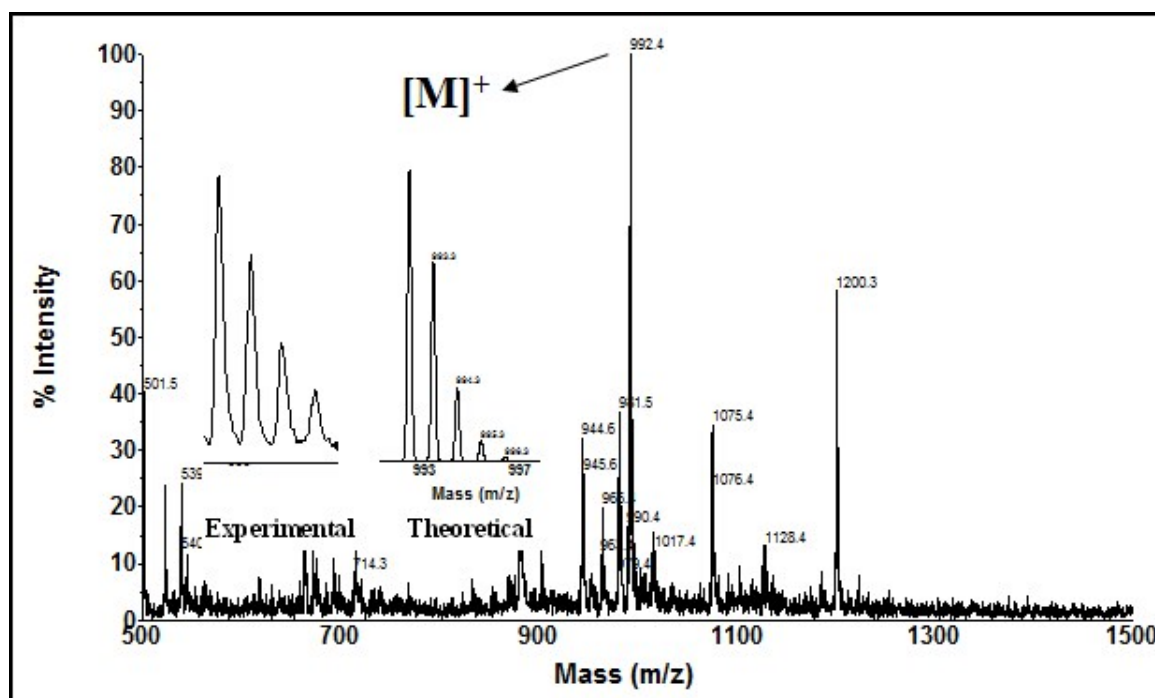

Figure S2. MALDI-TOF spectrum of PDI-3

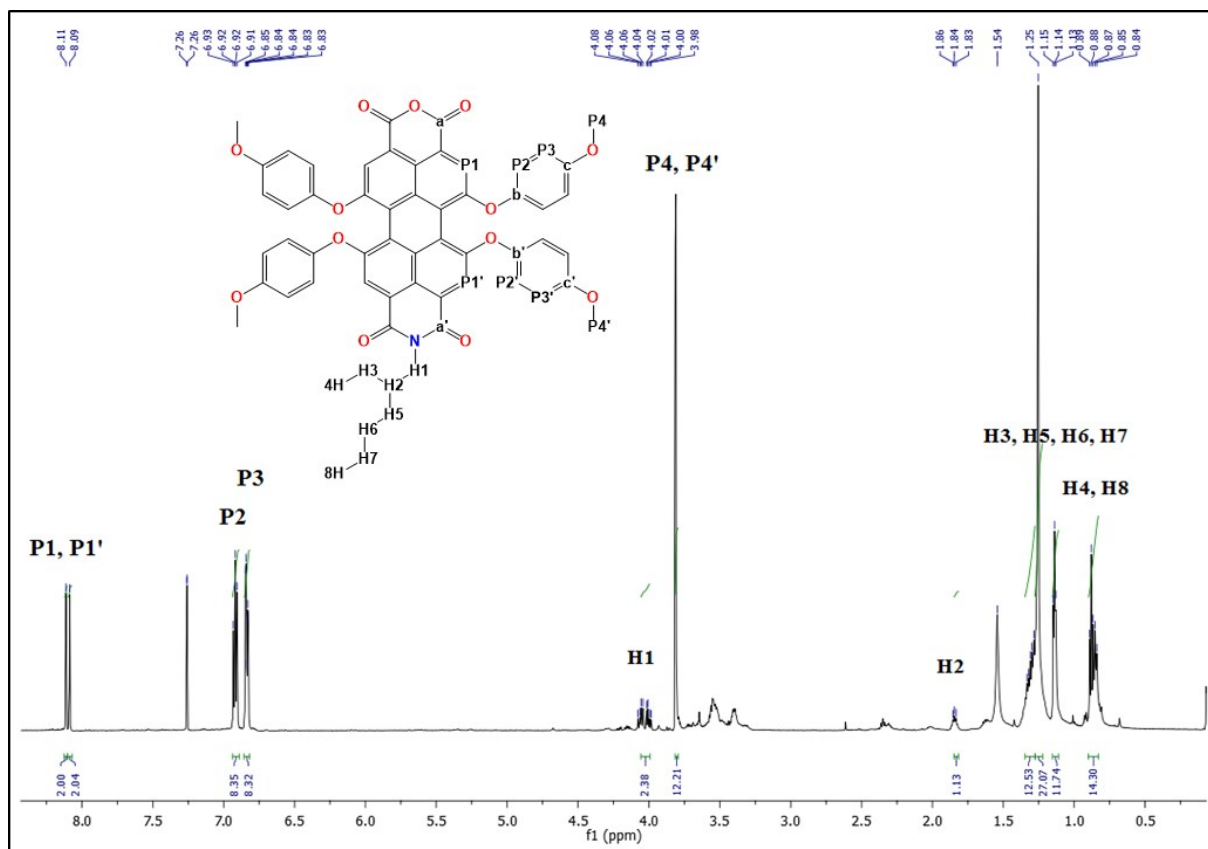

Figure S3. <sup>1</sup>H NMR spectrum of PDI-3

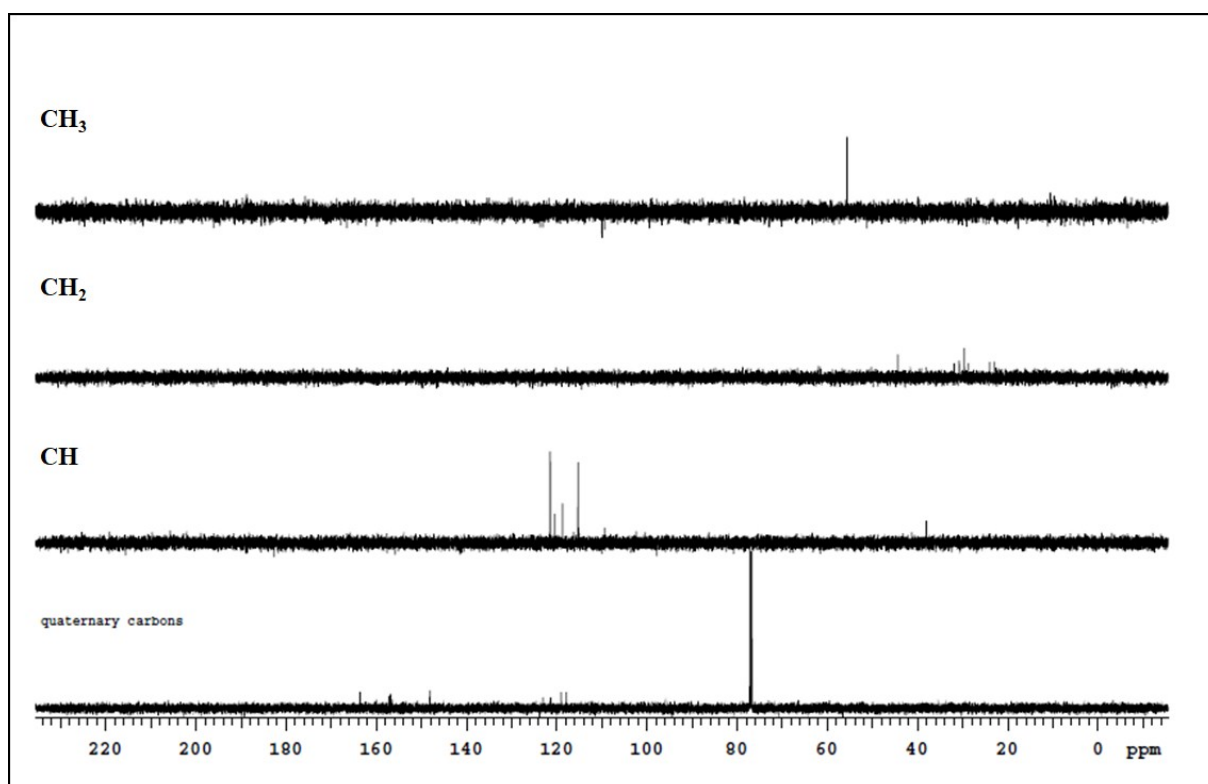

Figure S4. <sup>13</sup>C NMR DEPT spectrum of PDI-3

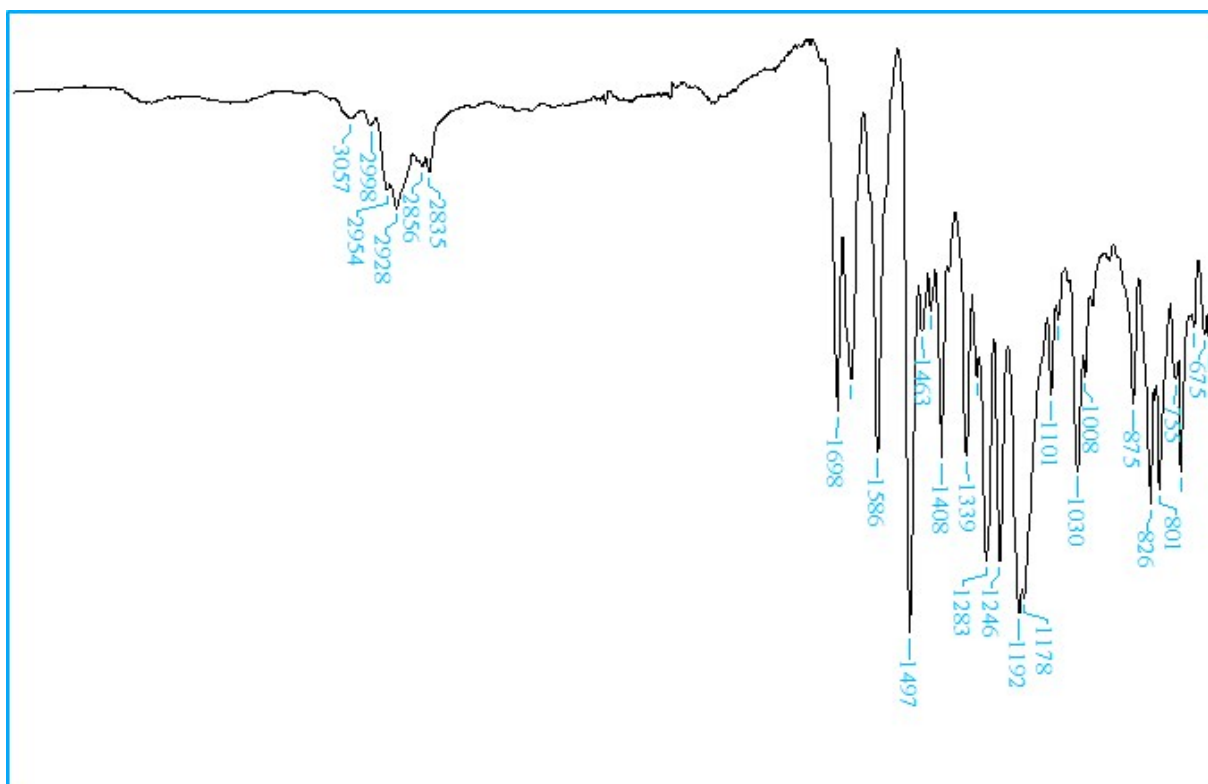

Figure S5. FT-IR spectrum of 1

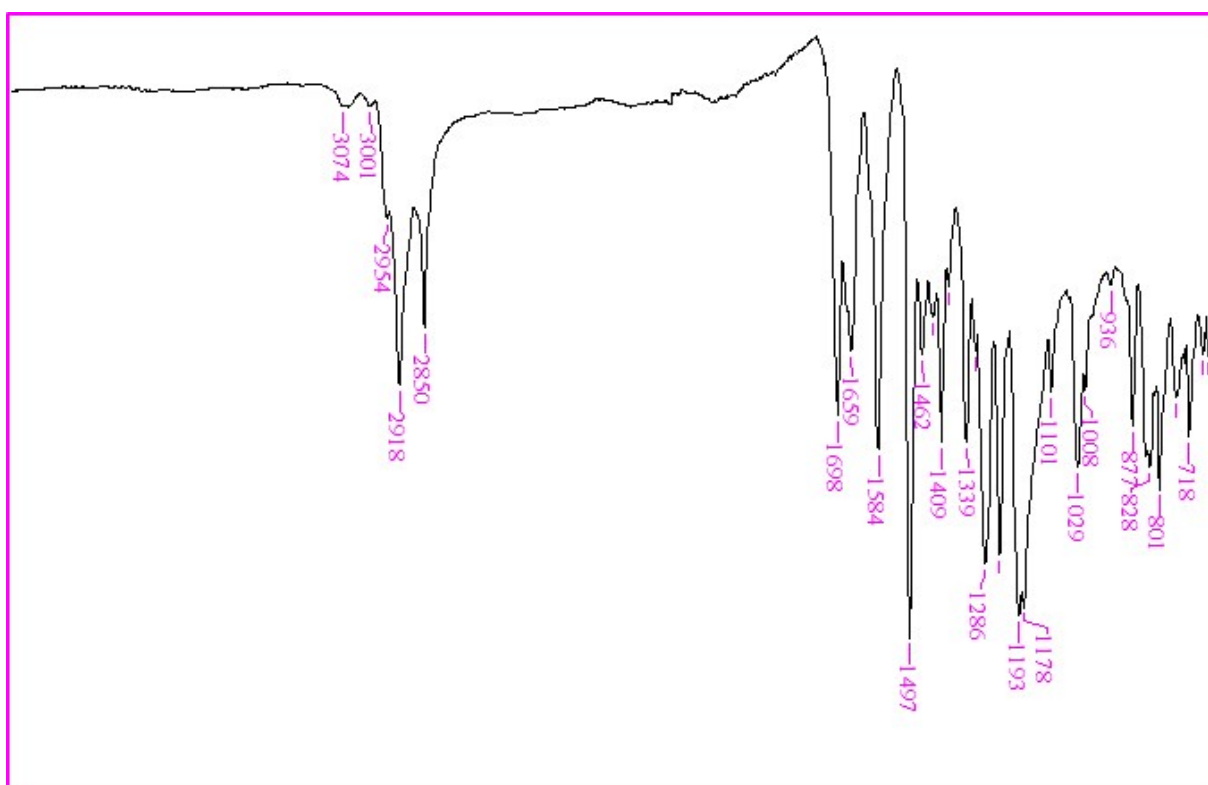

Figure S6. FT-IR spectrum of 2

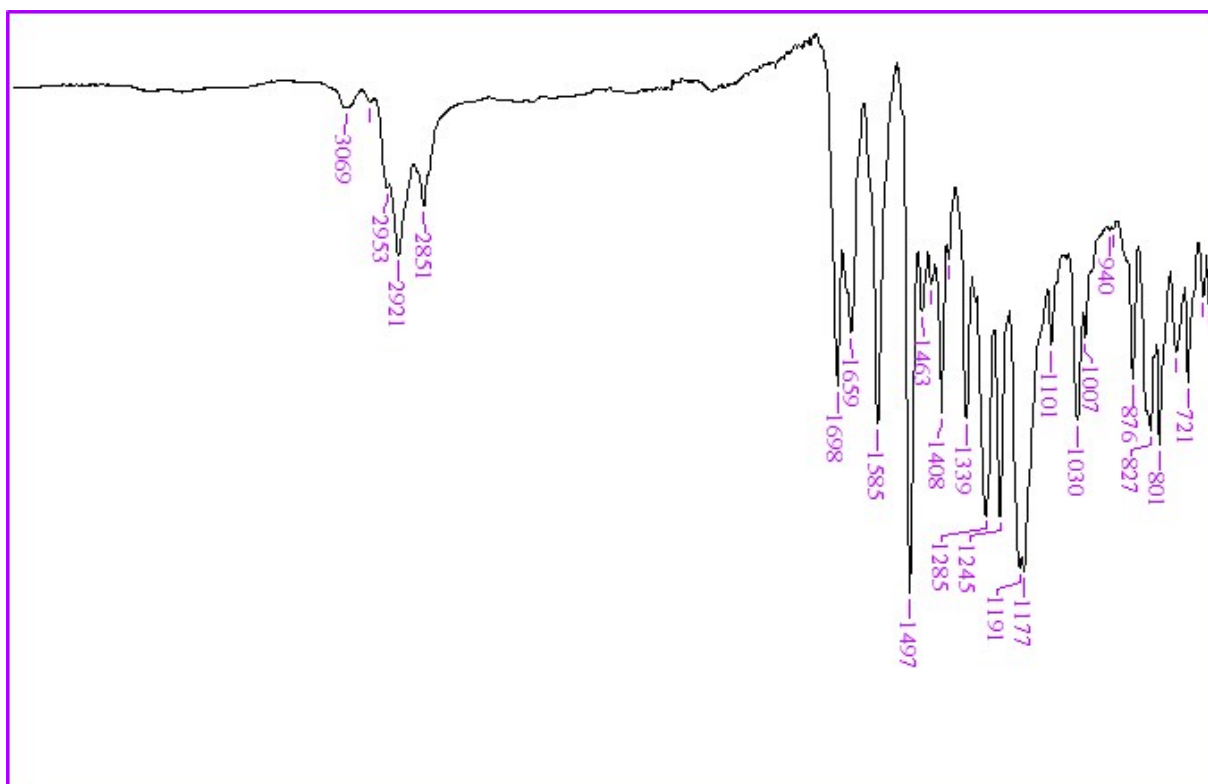

Figure S7. FT-IR spectrum of 3

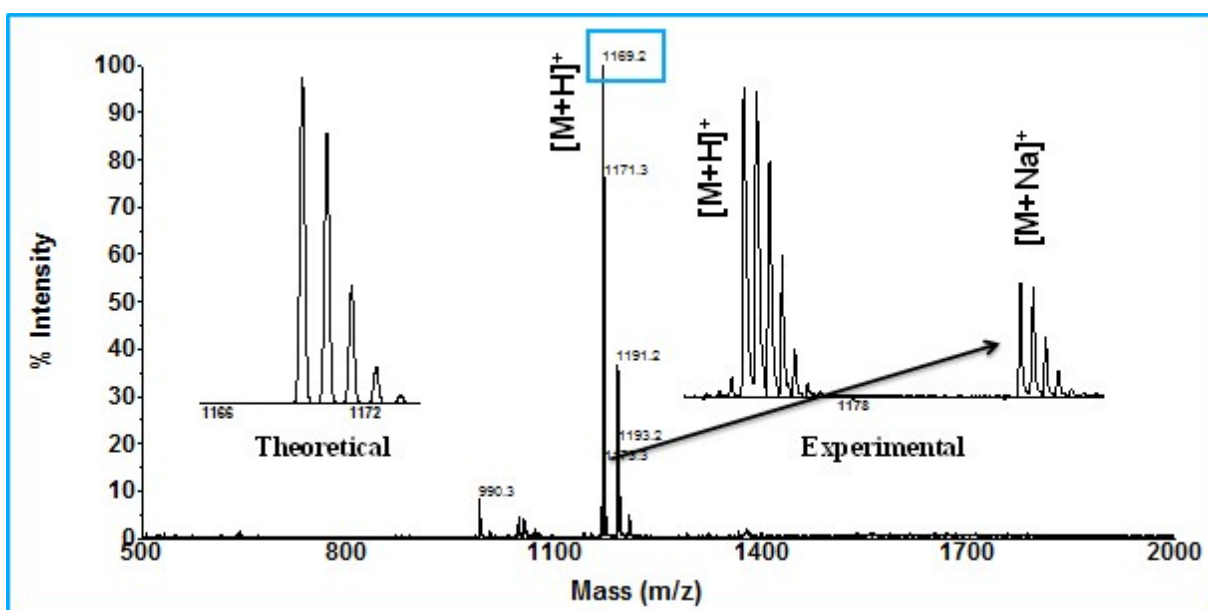

Figure S8. MALDI-TOF spectrum of 1

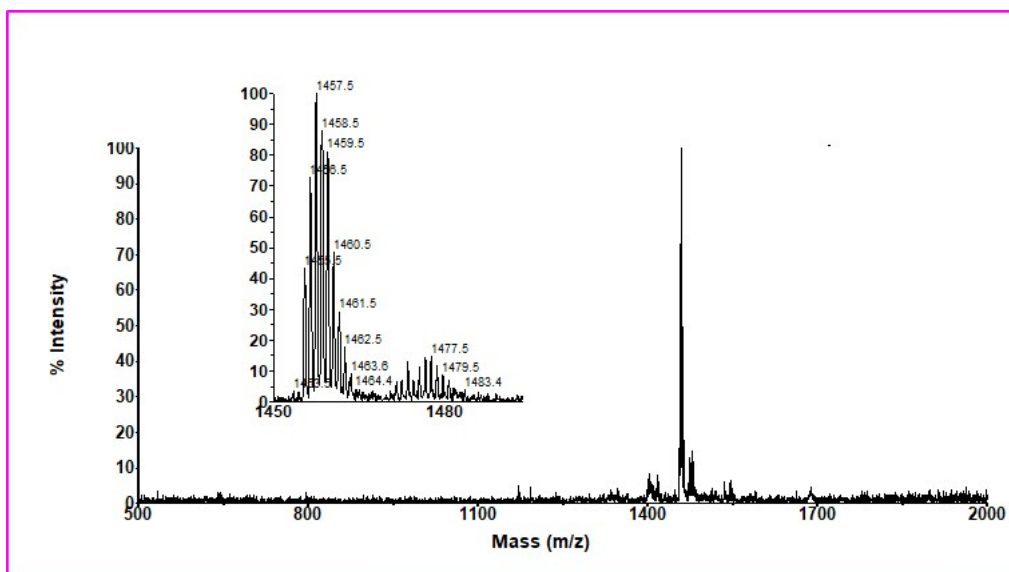

Figure S9. MALDI-TOF spectrum of 2

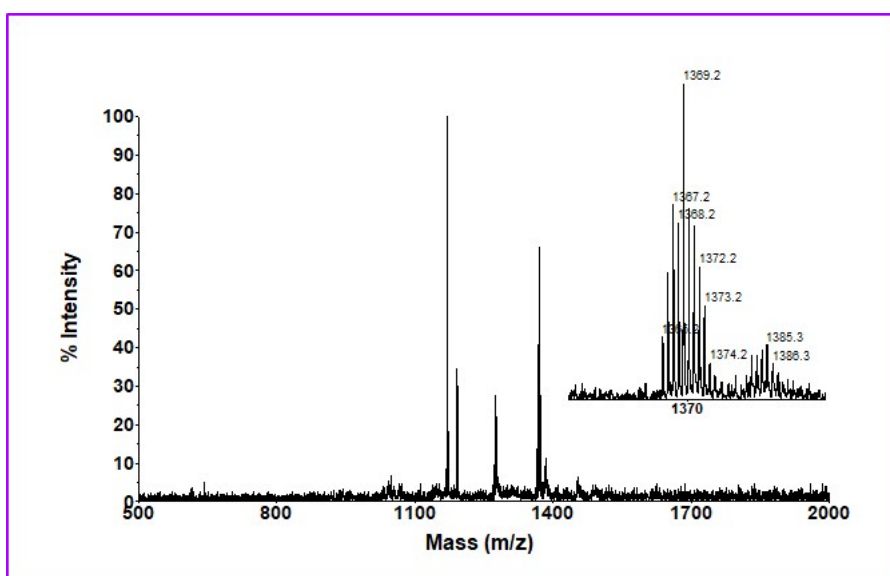

Figure S10. MALDI-TOF spectrum of 3



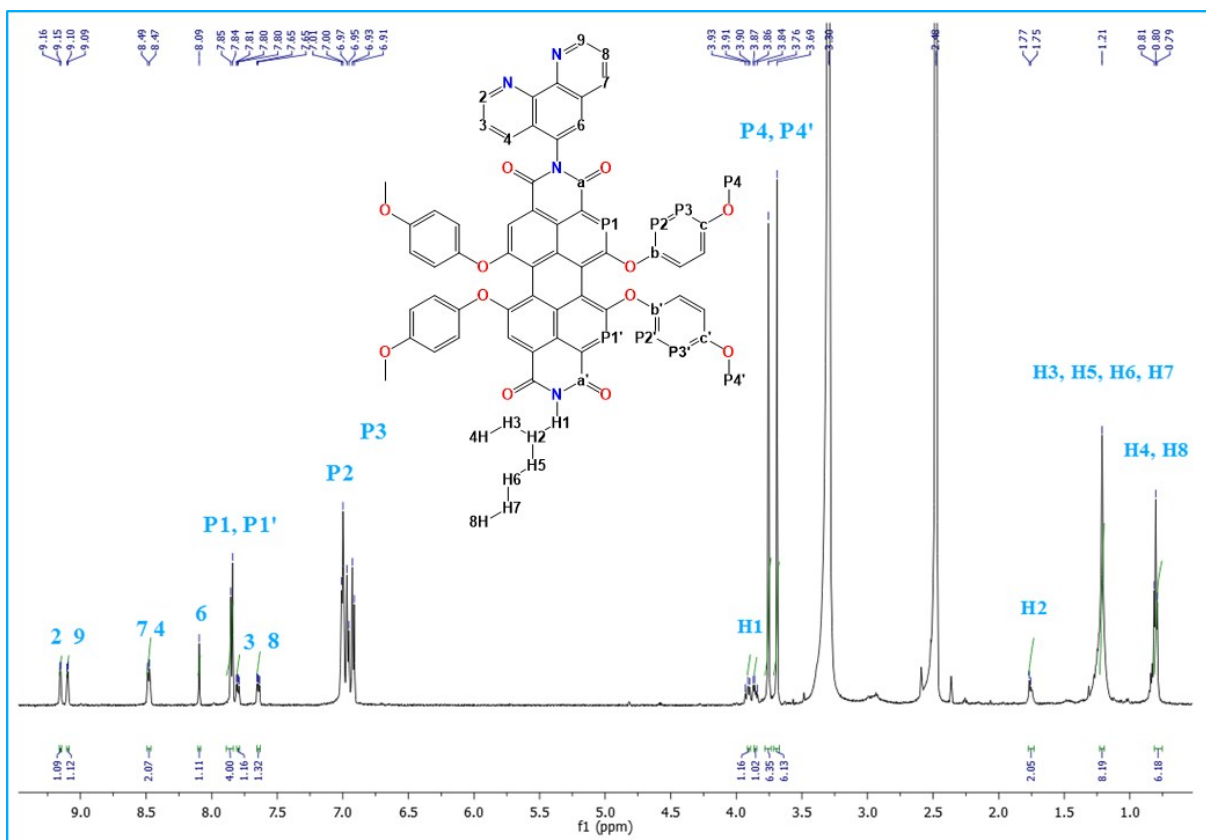

Figure S11. <sup>1</sup>H NMR spectrum of 1

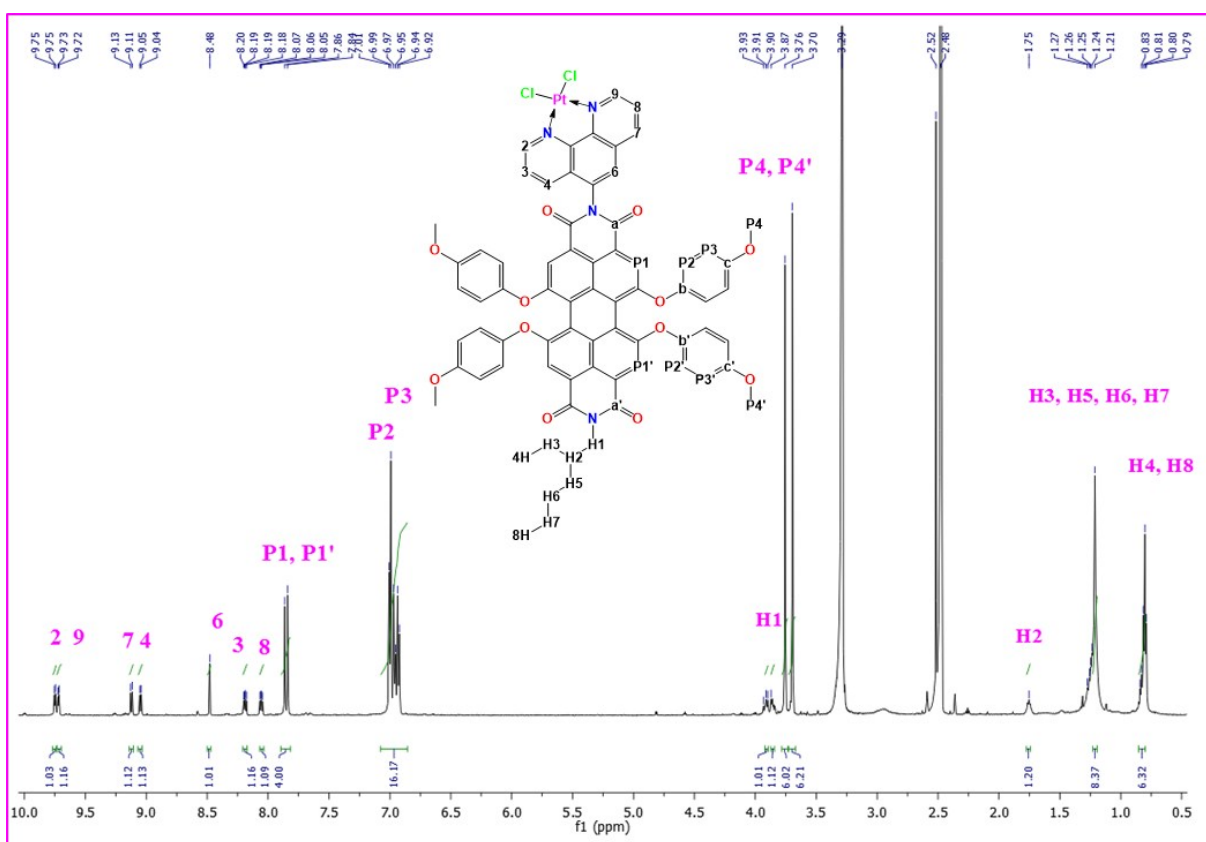

Figure S12. <sup>1</sup>H NMR spectrum of 2

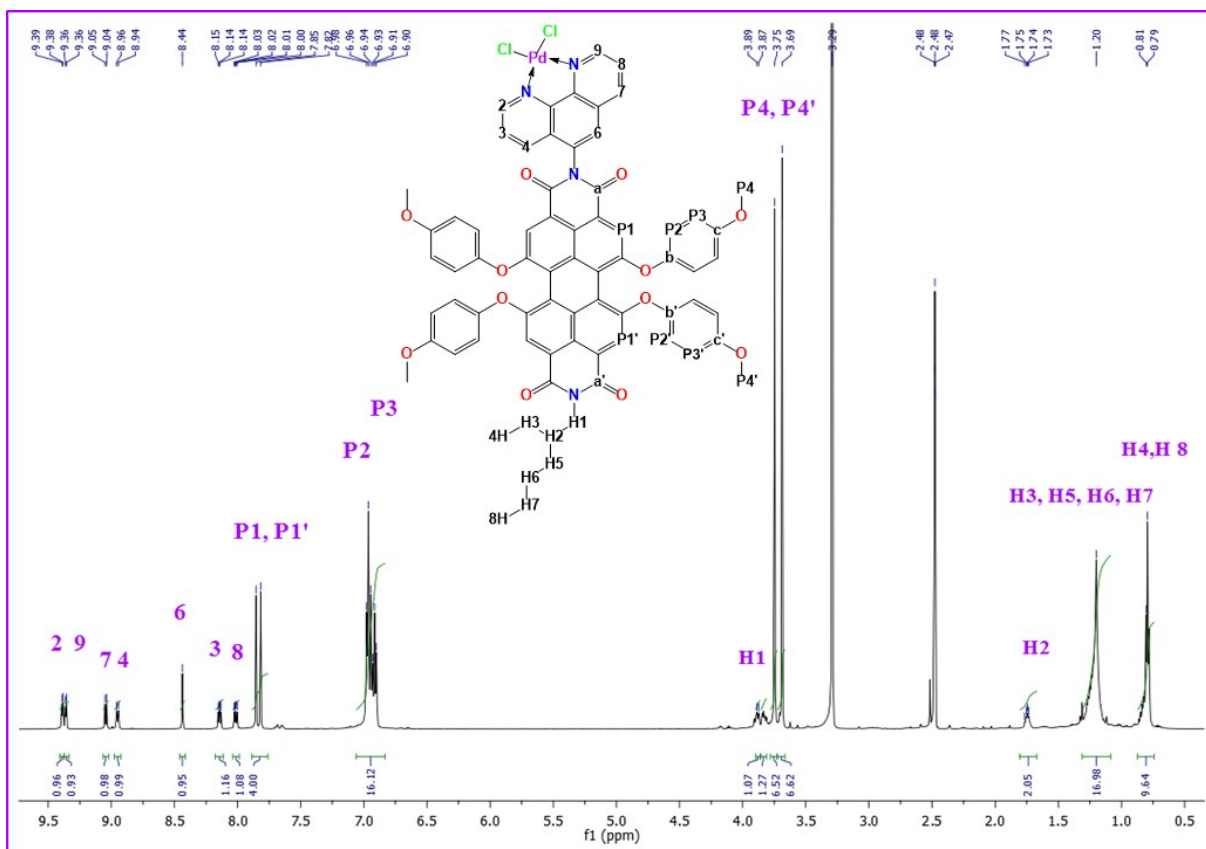

Figure S13. <sup>1</sup>H NMR spectrum of 3

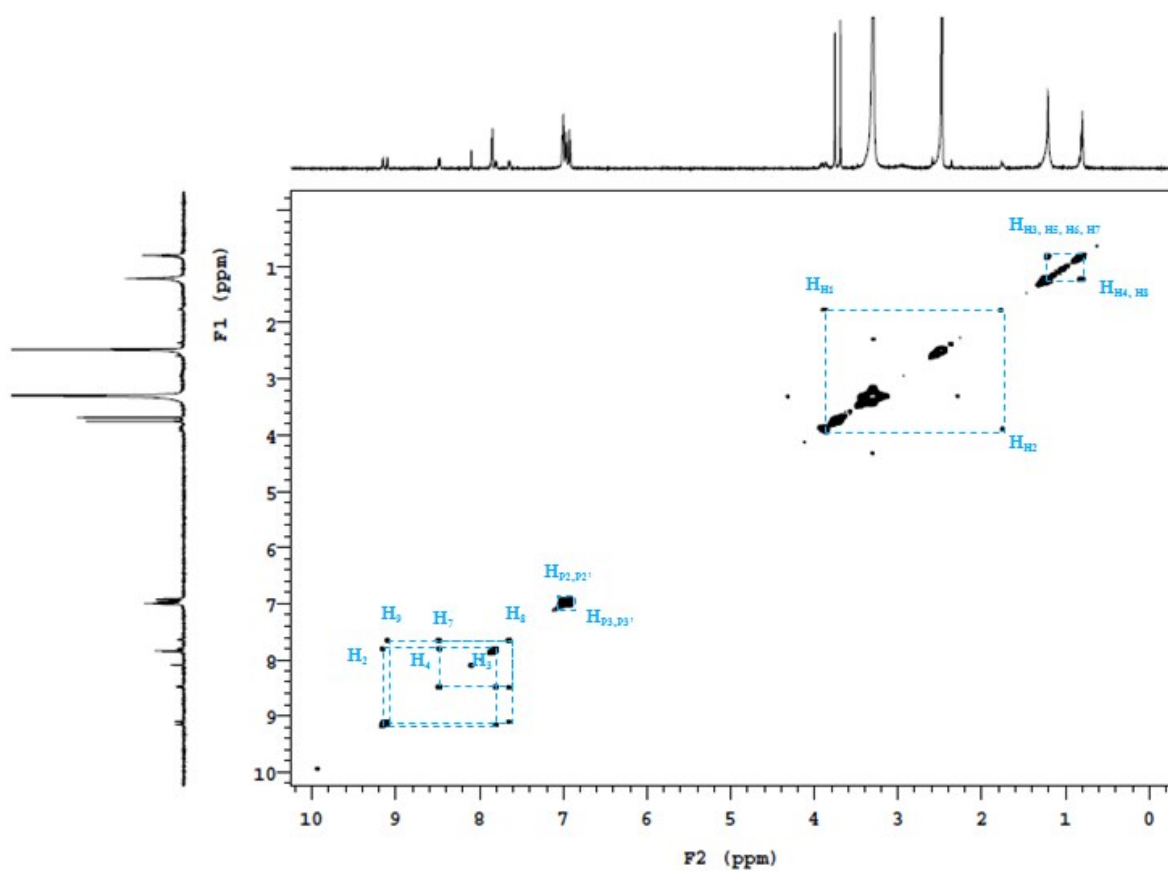

Figure S14. COSY spectrum of 1

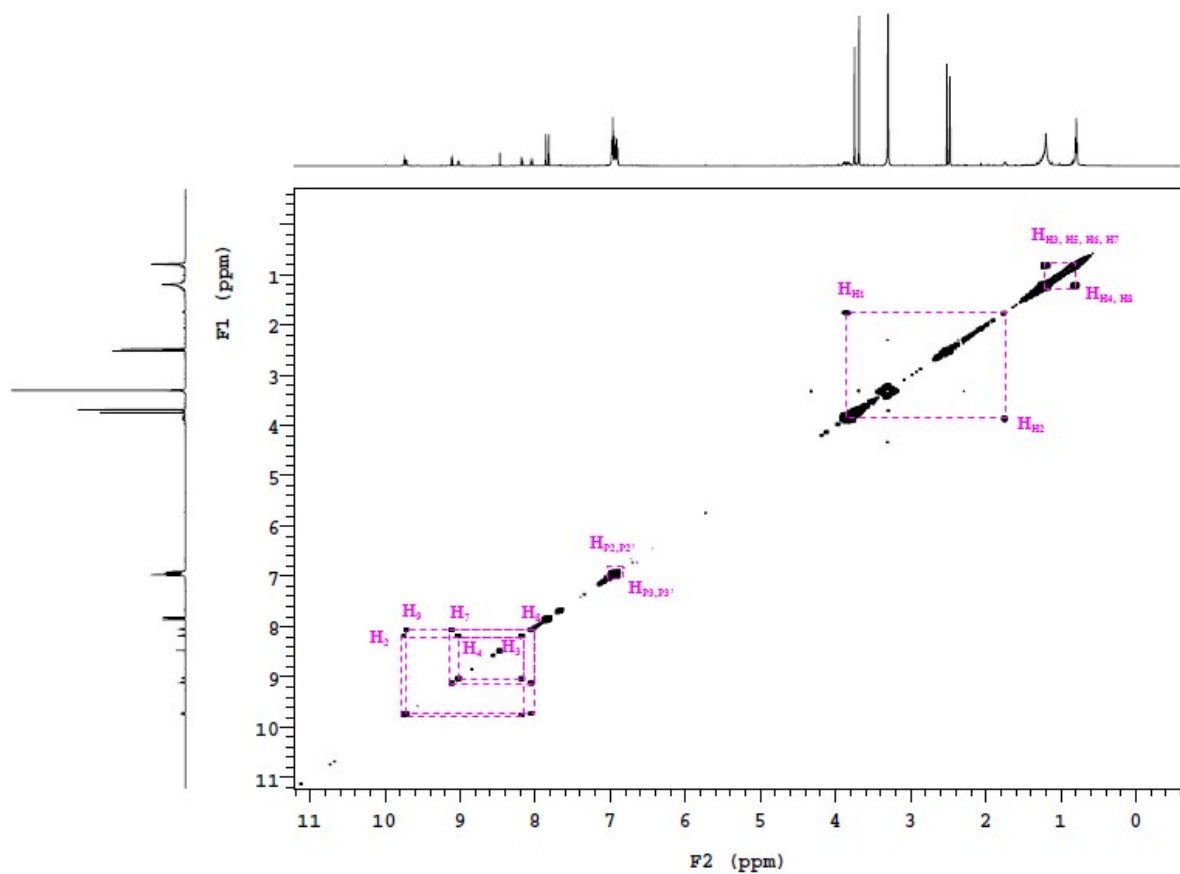

Figure S15. COSY spectrum of **2**

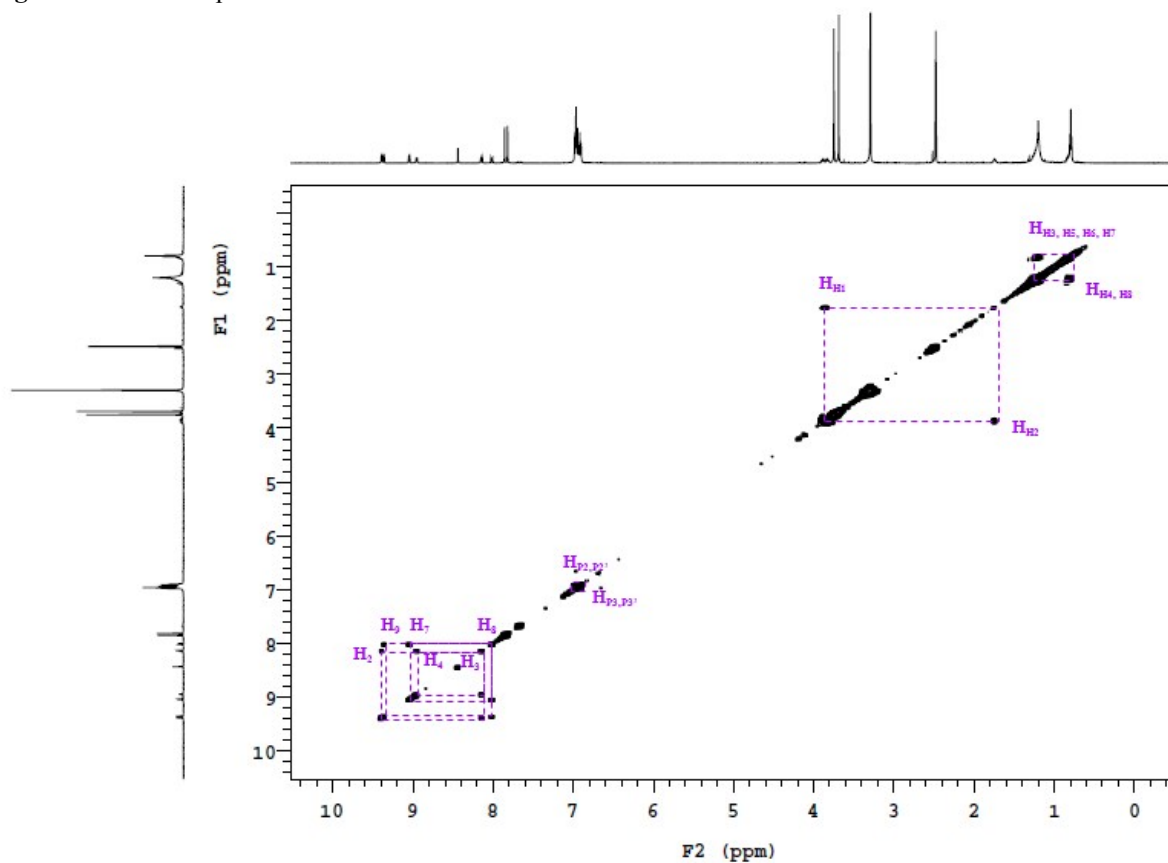

Figure S16. COSY spectrum of **3**



**Table S1.** <sup>1</sup>H chemical shifts (ppm) for compounds **1**, **2** and **3** in DMSO-*d*<sub>6</sub>

| Proton                   | <b>1</b>                        | <b>2</b>                        | <b>3</b>                        |
|--------------------------|---------------------------------|---------------------------------|---------------------------------|
|                          | □ <sub>H</sub> , <i>J</i> in Hz | □ <sub>H</sub> , <i>J</i> in Hz | □ <sub>H</sub> , <i>J</i> in Hz |
| H <sub>P1</sub>          | 7.85 (s, 2H)                    | 7.86 (s, 2H)                    | 7.85 (s, 2H)                    |
| H <sub>P1'</sub>         | 7.84 (s, 2H)                    | 7.84 (s, 2H)                    | 7.82 (s, 2H)                    |
| H <sub>P2</sub>          | 7.00 (m, 8H)                    | 7.01 (m, 8H)                    | 6.98 (m, 8H)                    |
| H <sub>P2'</sub>         |                                 |                                 |                                 |
| H <sub>P3</sub>          | 6.95 (m, 8H)                    | 6.95 (m, 8H)                    | 6.93 (m, 8H)                    |
| H <sub>P3'</sub>         |                                 |                                 |                                 |
| H <sub>P4</sub>          | 3.76 (s, 6H)                    | 3.76 (s, 6H)                    | 3.75 (s, 6H)                    |
| H <sub>P4'</sub>         | 3.69 (s, 6H)                    | 3.70 (s, 6H)                    | 3.69 (s, 6H)                    |
| H <sub>2</sub>           | 9.16 (d, <i>J</i> = 3.89, 1H)   | 9.75 (d, <i>J</i> = 5.53, 1H)   | 9.39 (d, <i>J</i> = 5.27, 1H)   |
| H <sub>3</sub>           | 7.80 (dd, <i>J</i> = 4.08, 1H)  | 8.19 (dd, <i>J</i> = 5.59, 1H)  | 8.14 (dd, <i>J</i> = 5.52, 1H)  |
| H <sub>4</sub>           | 8.47 (m, 1H)                    | 9.05 (d, <i>J</i> = 8.17, 1H)   | 8.96 (d, <i>J</i> = 8.15, 1H)   |
| H <sub>6</sub>           | 8.09 (s, 1H)                    | 8.48 (s, 1H)                    | 8.44 (s, 1H)                    |
| H <sub>7</sub>           | 8.49 (m, 8H)                    | 9.13 (d, <i>J</i> = 8.53, 1H)   | 9.05 (d, <i>J</i> = 8.47, 1H)   |
| H <sub>8</sub>           | 7.64 (dd, <i>J</i> = 4.11, 1H)  | 8.07 (dd, <i>J</i> = 5.55, 1H)  | 8.02 (dd, <i>J</i> = 5.39, 1H)  |
| H <sub>9</sub>           | 9.10 (d, <i>J</i> = 4.07, 1H)   | 9.73 (d, <i>J</i> = 5.52, 1H)   | 9.36 (d, <i>J</i> = 5.13, 1H)   |
| H <sub>H1</sub>          | 3.87 (m, 2H)                    | 3.89 (m, 2H)                    | 3.84 (m, 2H)                    |
| H <sub>H2</sub>          | 1.75 (m, 1H)                    | 1.75 (m, 1H)                    | 1.74 (m, 1H)                    |
| H <sub>H3,H5,H6,H7</sub> | 1.21 (m, 8H)                    | 1.21 (m, 8H)                    | 1.20 (m, 8H)                    |
| H <sub>H4,H8</sub>       | 0.80 (m, 6H)                    | 0.80 (m, 6H)                    | 0.79 (m, 6H)                    |

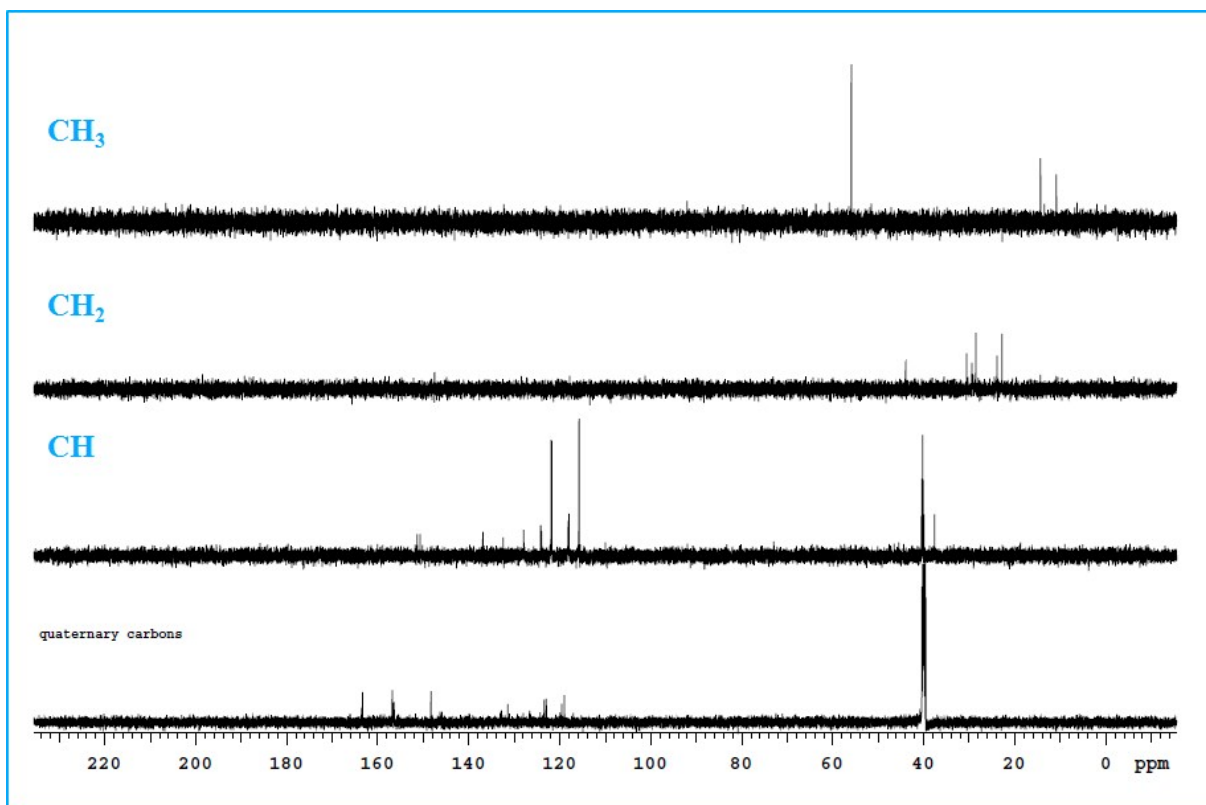

Figure S17. <sup>13</sup>C NMR DEPT spectrum of **1**

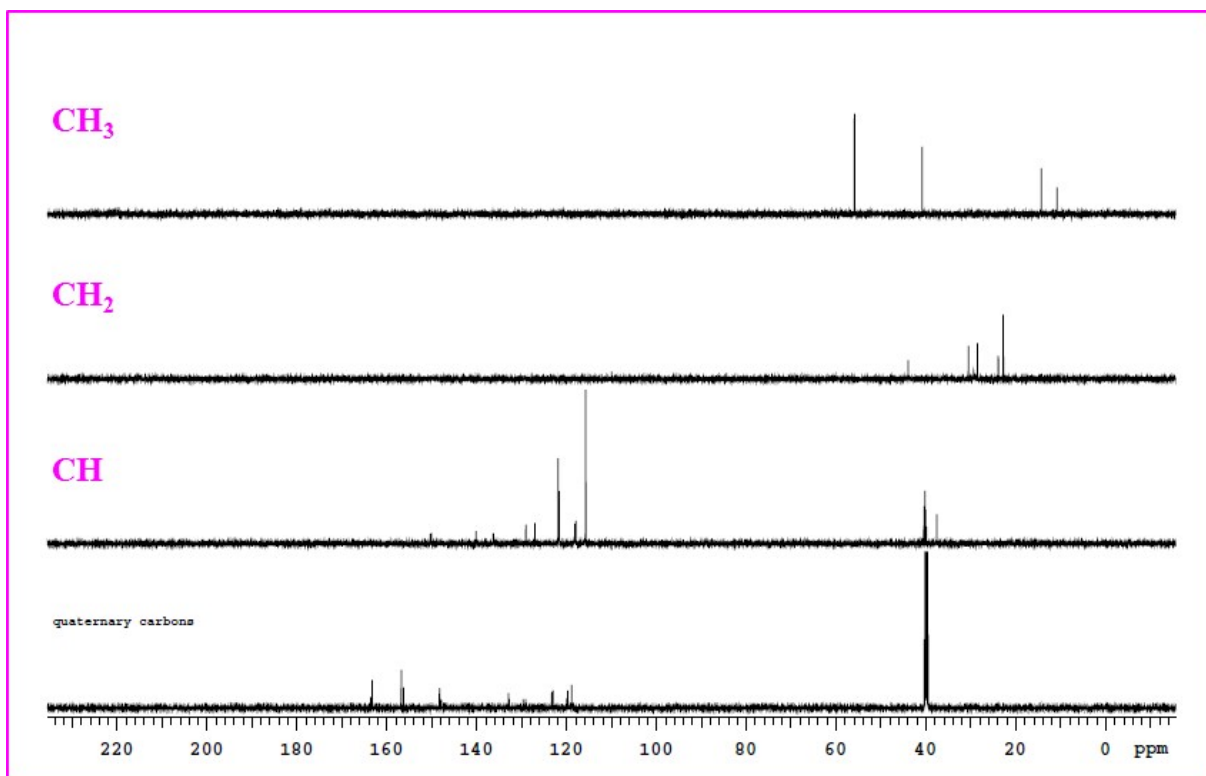

Figure S18. <sup>13</sup>C NMR DEPT spectrum of **2**

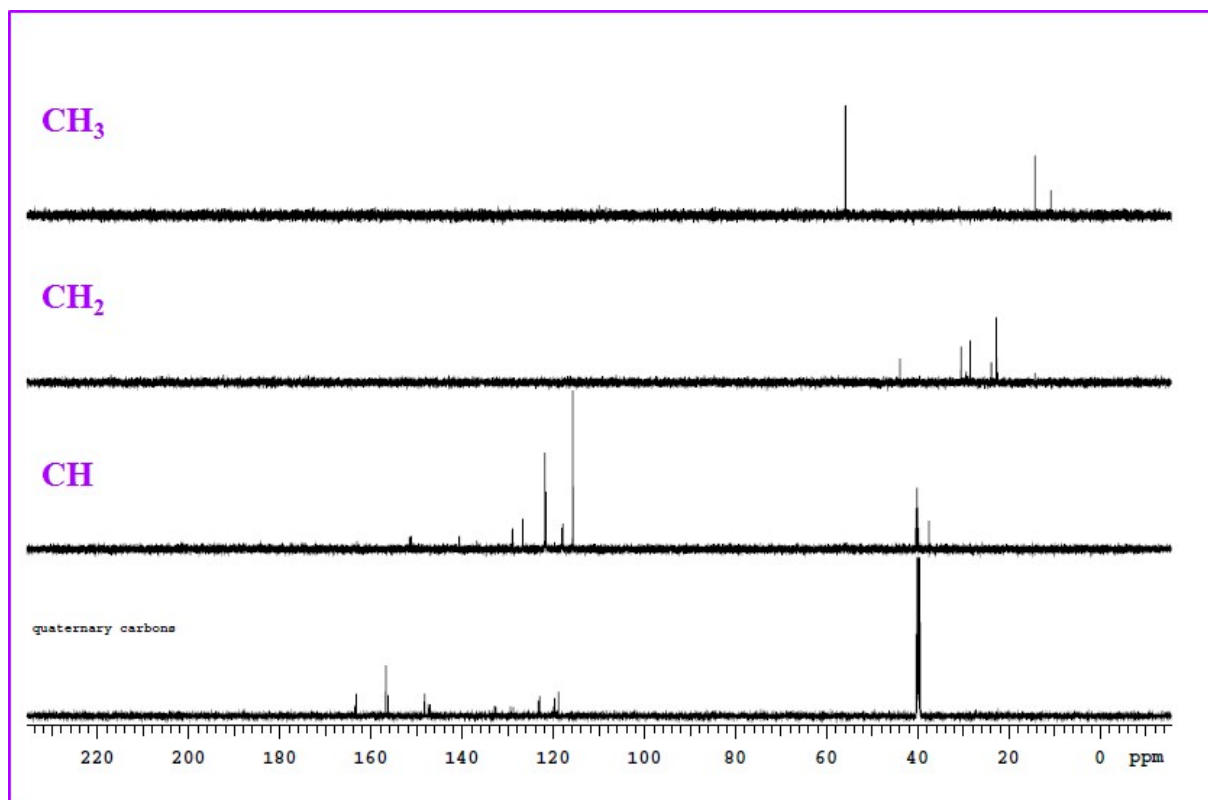

Figure S19. <sup>13</sup>C NMR DEPT spectrum of **3**

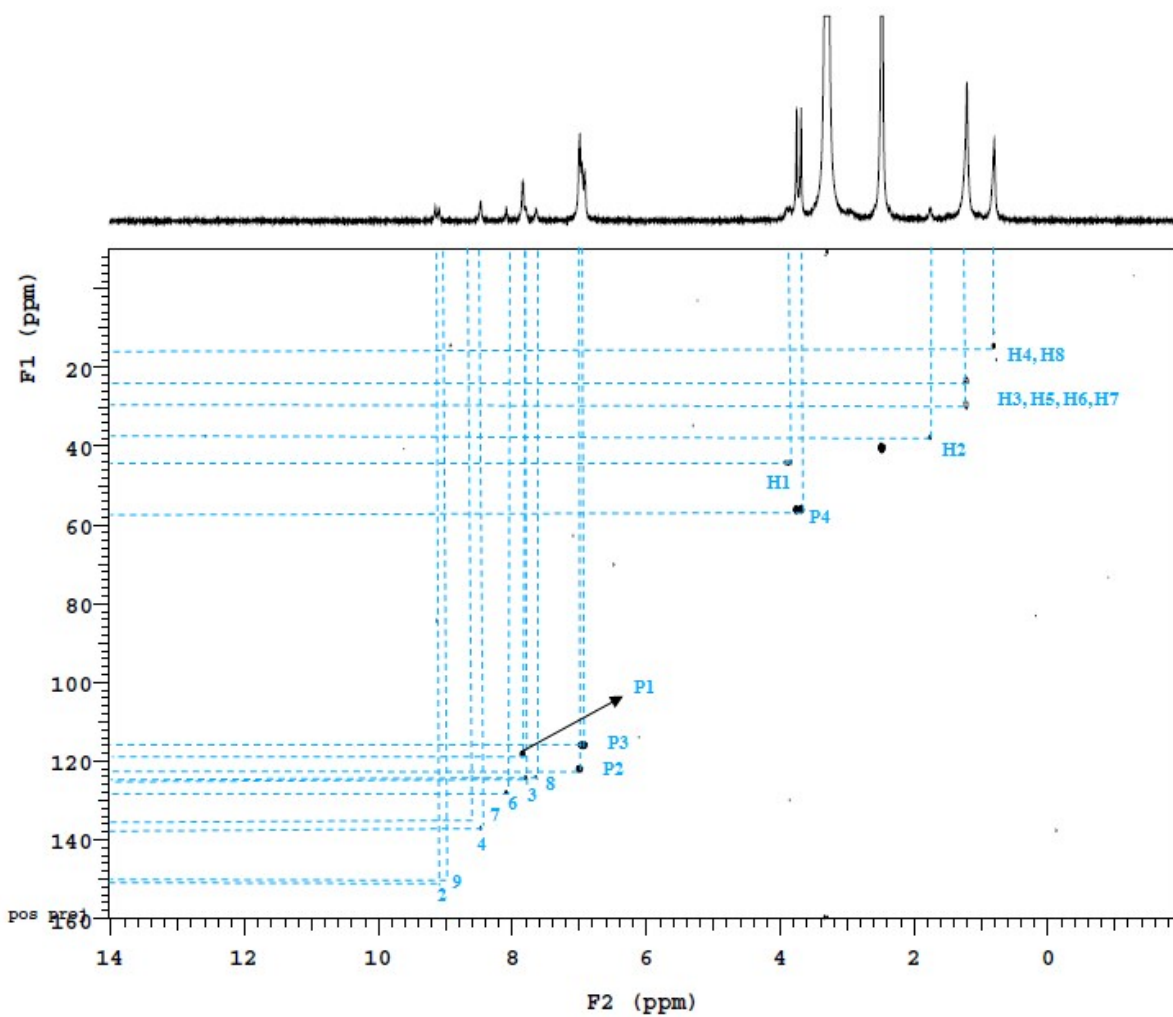

Figure S20. HSQC spectrum of 1



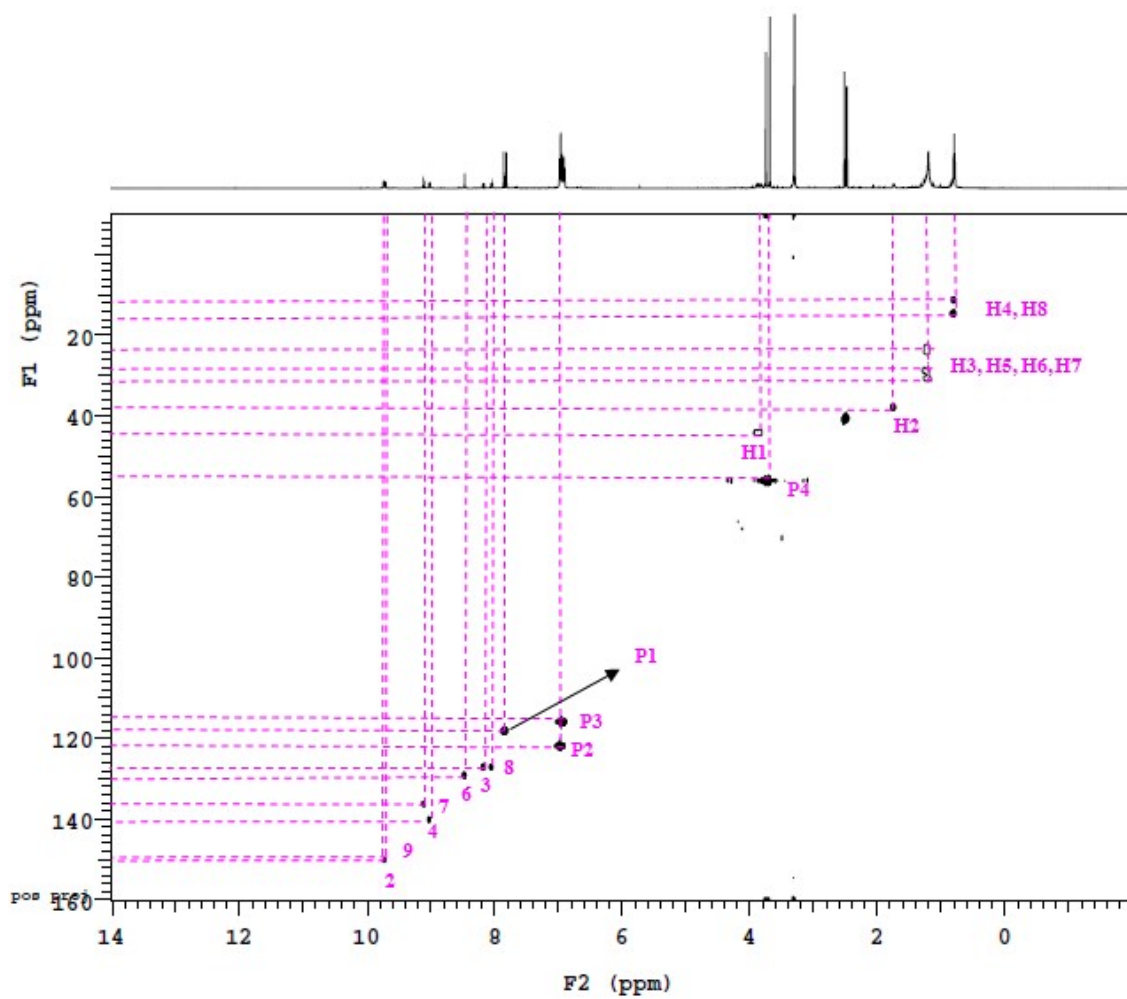

Figure S21. HSQC spectrum of 2

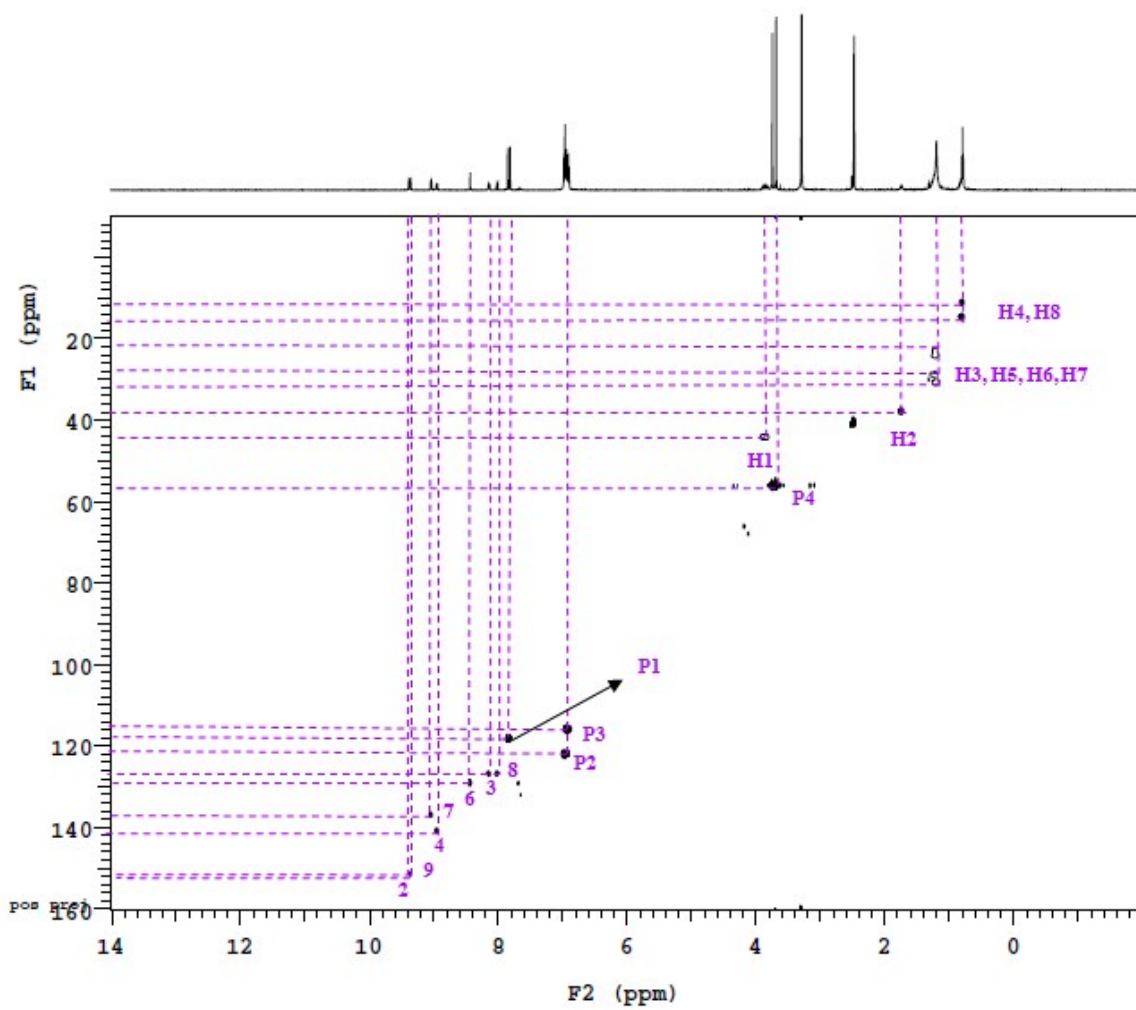

Figure S22. HSQC spectrum of 3

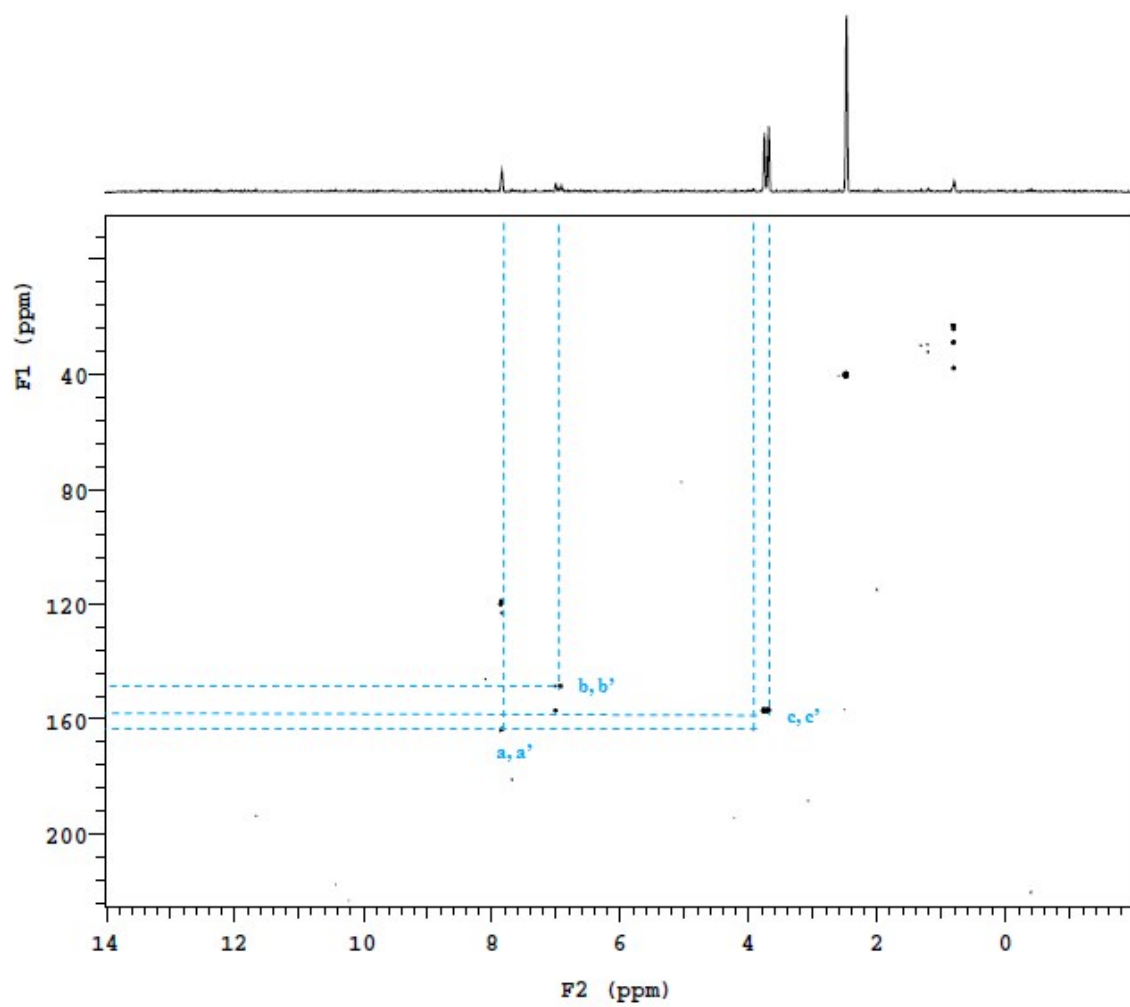

Figure S23. HMBC spectrum of **1**

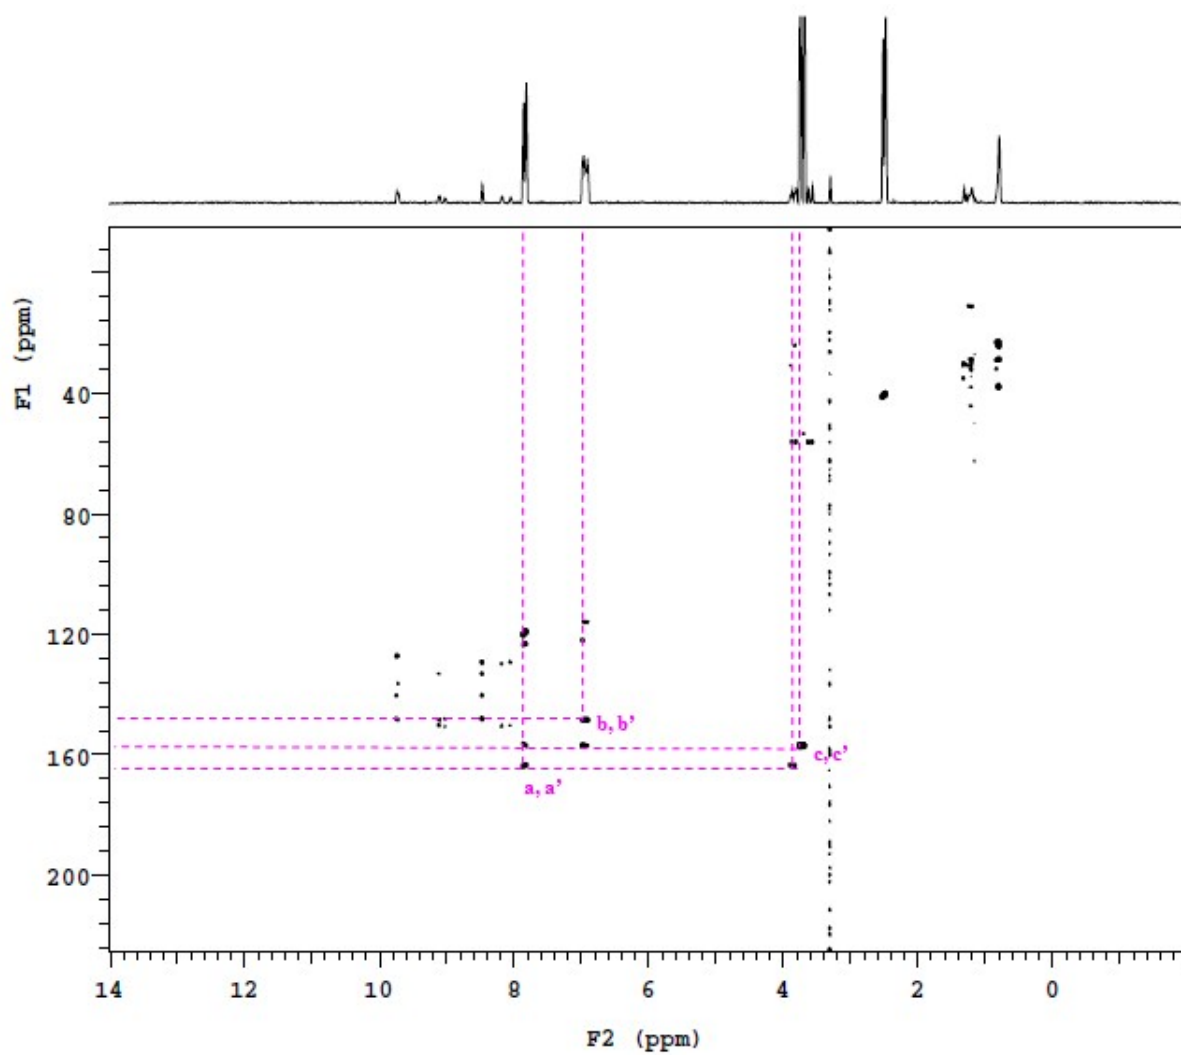

Figure S24. HMBC spectrum of 2

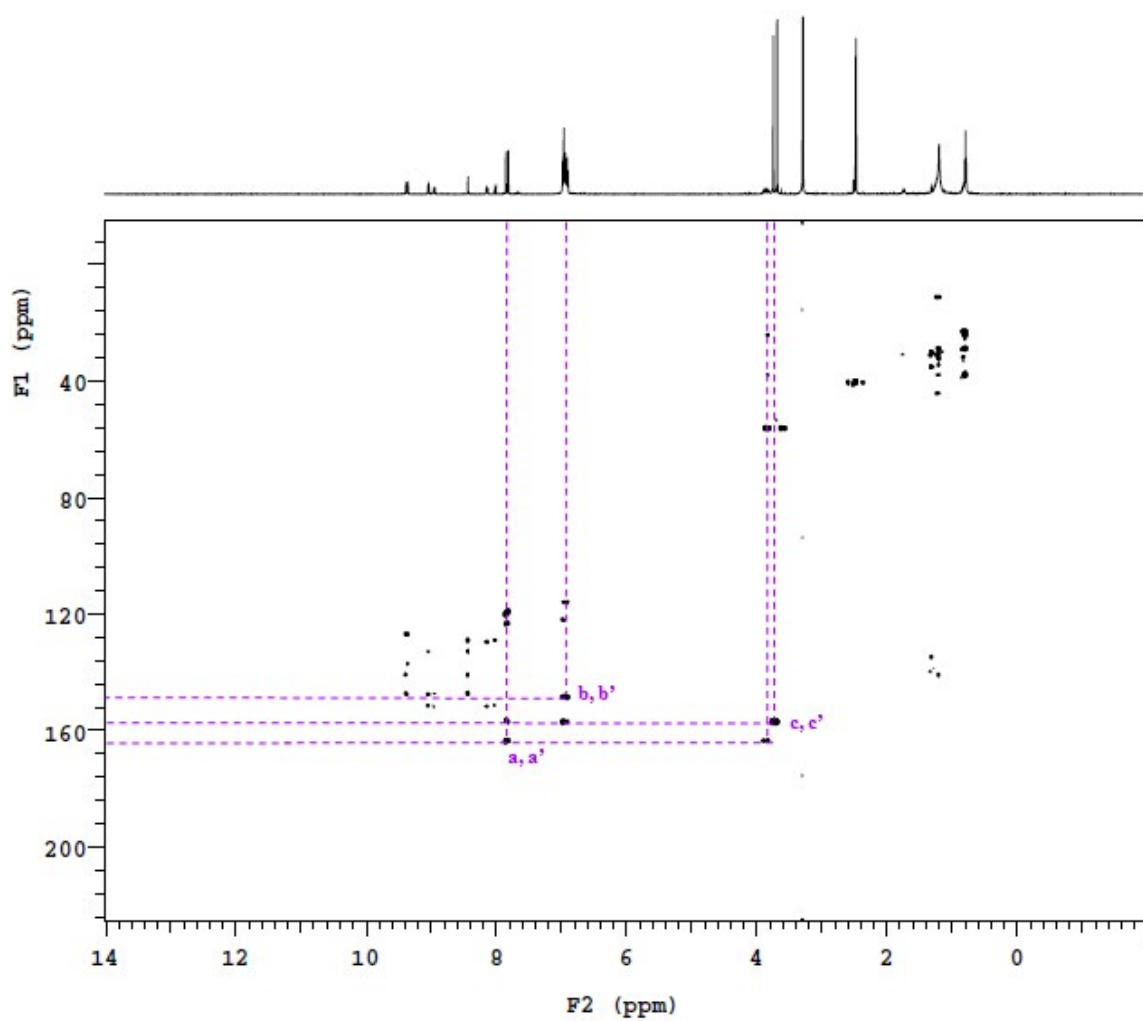

Figure S25. HMBC spectrum of 3

**Table S2.**  $^{13}\text{C}$  chemical shifts (ppm) for compounds **1**, **2** and **3** in  $\text{DMSO-}d_6$ 

| Carbon                                                                                   | <b>1</b>             | <b>2</b>             | <b>3</b>             |
|------------------------------------------------------------------------------------------|----------------------|----------------------|----------------------|
|                                                                                          | $\square_{\text{C}}$ | $\square_{\text{C}}$ | $\square_{\text{C}}$ |
| $\text{C}_{\text{P1}}$                                                                   | 118.153              | 118.176              | 118.169              |
| $\text{C}_{\text{P1}'}$                                                                  | 117.992              | 117.969              | 117.969              |
| $\text{C}_{\text{P2}}$                                                                   | 121.908              | 121.901              | 121.901              |
| $\text{C}_{\text{P2}'}$                                                                  | 121.770              | 121.694              | 121.694              |
| $\text{C}_{\text{P3}}$                                                                   | 115.793              | 115.770              | 115.770              |
| $\text{C}_{\text{P3}'}$                                                                  | 115.755              | 115.770              | 115.770              |
| $\text{C}_{\text{P4}}$                                                                   | 55.945               | 55.953               | 55.953               |
| $\text{C}_{\text{P4}'}$                                                                  | 55.907               | 55.922               | 55.914               |
| $\text{C}_{\text{a}}$                                                                    | 163.564              | 163.580              | 163.564              |
| $\text{C}_{\text{a}'}$                                                                   | 163.342              | 163.304              | 163.304              |
| $\text{C}_{\text{b}}$                                                                    | 148.369              | 148.346              | 148.346              |
| $\text{C}_{\text{b}'}$                                                                   | 148.323              | 148.277              | 148.277              |
| $\text{C}_{\text{c}}$                                                                    | 156.875              | 156.882              | 156.882              |
| $\text{C}_{\text{c}'}$                                                                   | 156.798              | 156.798              | 156.798              |
| $\text{C}_2$                                                                             | 151.334              | 150.369              | 151.587              |
| $\text{C}_3$                                                                             | 124.182              | 127.073              | 126.759              |
| $\text{C}_4$                                                                             | 136.912              | 140.169              | 140.698              |
| $\text{C}_6$                                                                             | 127.916              | 129.096              | 129.020              |
| $\text{C}_7$                                                                             | 132.437              | 136.330              | 136.821              |
| $\text{C}_8$                                                                             | 124.000              | 127.073              | 126.759              |
| $\text{C}_9$                                                                             | 150.698              | 150.124              | 151.265              |
| $\text{C}_{\text{H1}}$                                                                   | 43.998               | 43.983               | 43.983               |
| $\text{C}_{\text{H2}}$                                                                   | 37.653               | 37.638               | 37.638               |
|                                                                                          | 22.825               | 22.818               | 22.818               |
|                                                                                          | 23.937               | 23.929               | 23.929               |
| $\text{C}_{\text{H3}}, \text{C}_{\text{H5}}, \text{C}_{\text{H6}}, \text{C}_{\text{H7}}$ | 28.573               | 28.565               | 28.565               |
|                                                                                          | 30.588               | 30.580               | 30.580               |
|                                                                                          | 10.871               | 10.863               | 10.863               |
| $\text{C}_{\text{H4}}, \text{C}_{\text{H8}}$                                             | 14.358               | 14.350               | 14.350               |

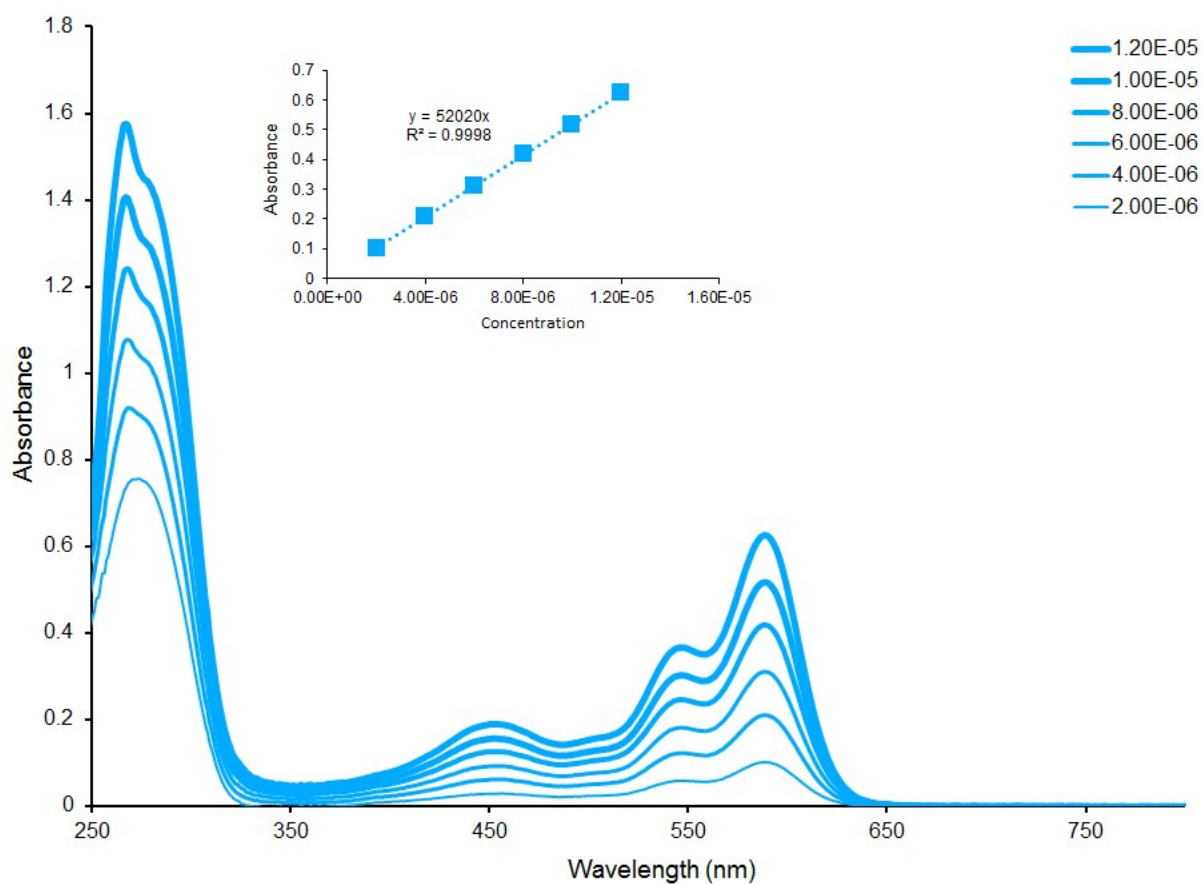

**Figure S26.** Electronic absorption spectra of **1** in DMSO at different concentrations (inset: plot of absorbance vs. concentration)

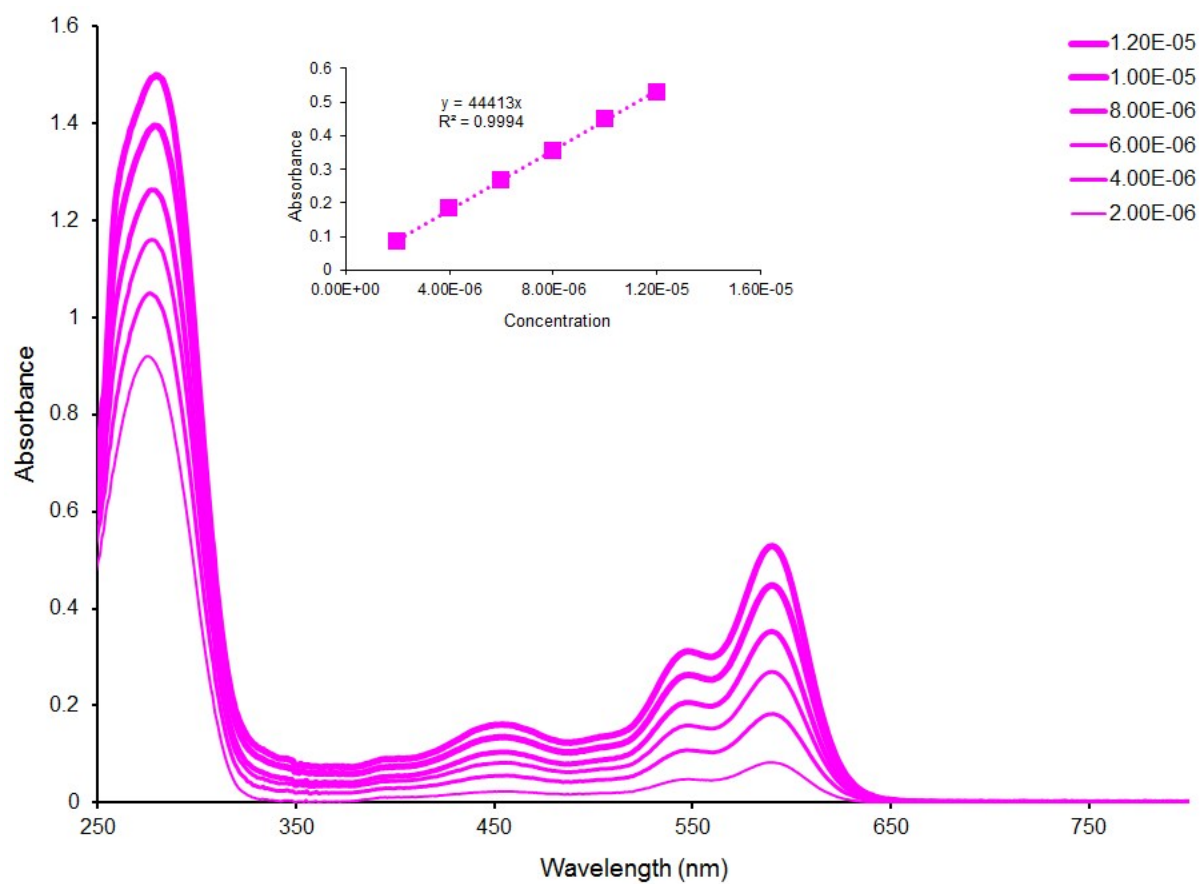

**Figure S27.** Electronic absorption spectra of **2** in DMSO at different concentrations (inset: plot of absorbance vs. concentration)



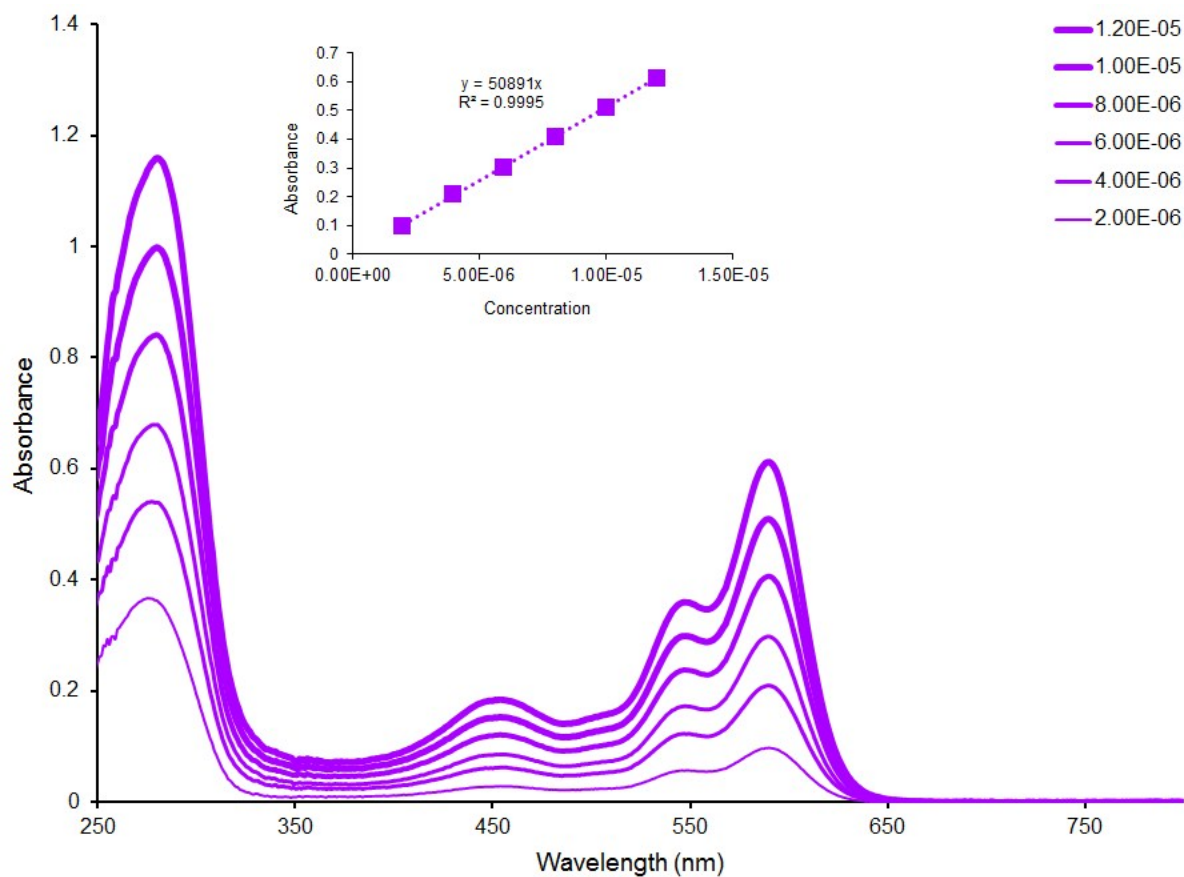

**Figure S28.** Electronic absorption spectra of **3** in DMSO at different concentrations (inset: plot of absorbance vs. concentration)

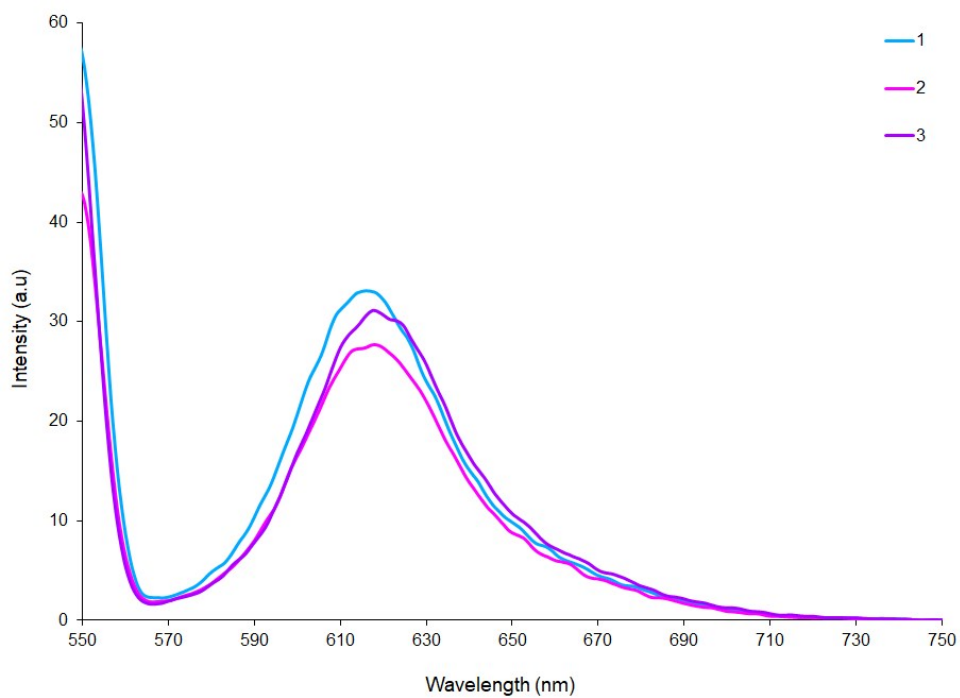

**Figure S29.** The fluorescence emission spectra of **1**, **2** and **3** in DMSO ( $1.0 \times 10^{-5}$  M). (Excitation wavelength = 550 nm)

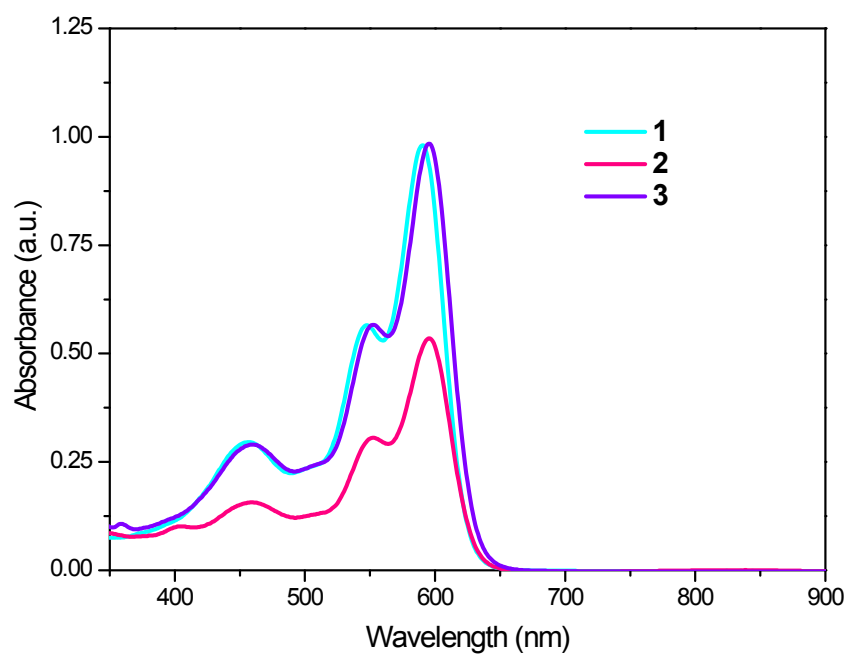

**Figure S30.** UV-Vis absorption spectra of **1**, **2** and **3** at  $5 \times 10^{-5}$  M in DCM.

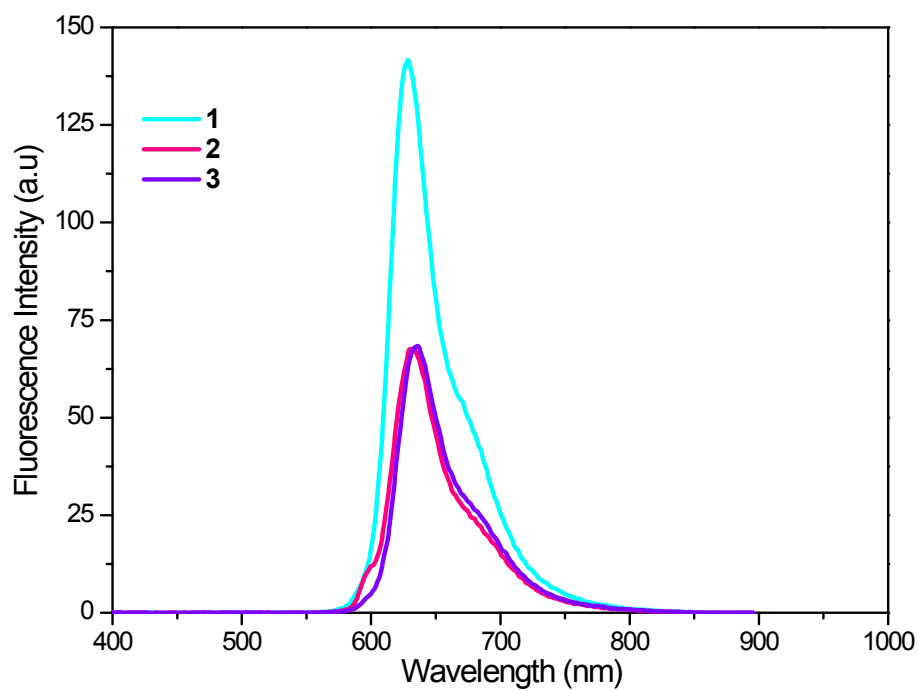

**Figure S31.** Fluorescence spectra of **1**, **2** and **3** at  $5 \times 10^{-5}$  M in DCM.

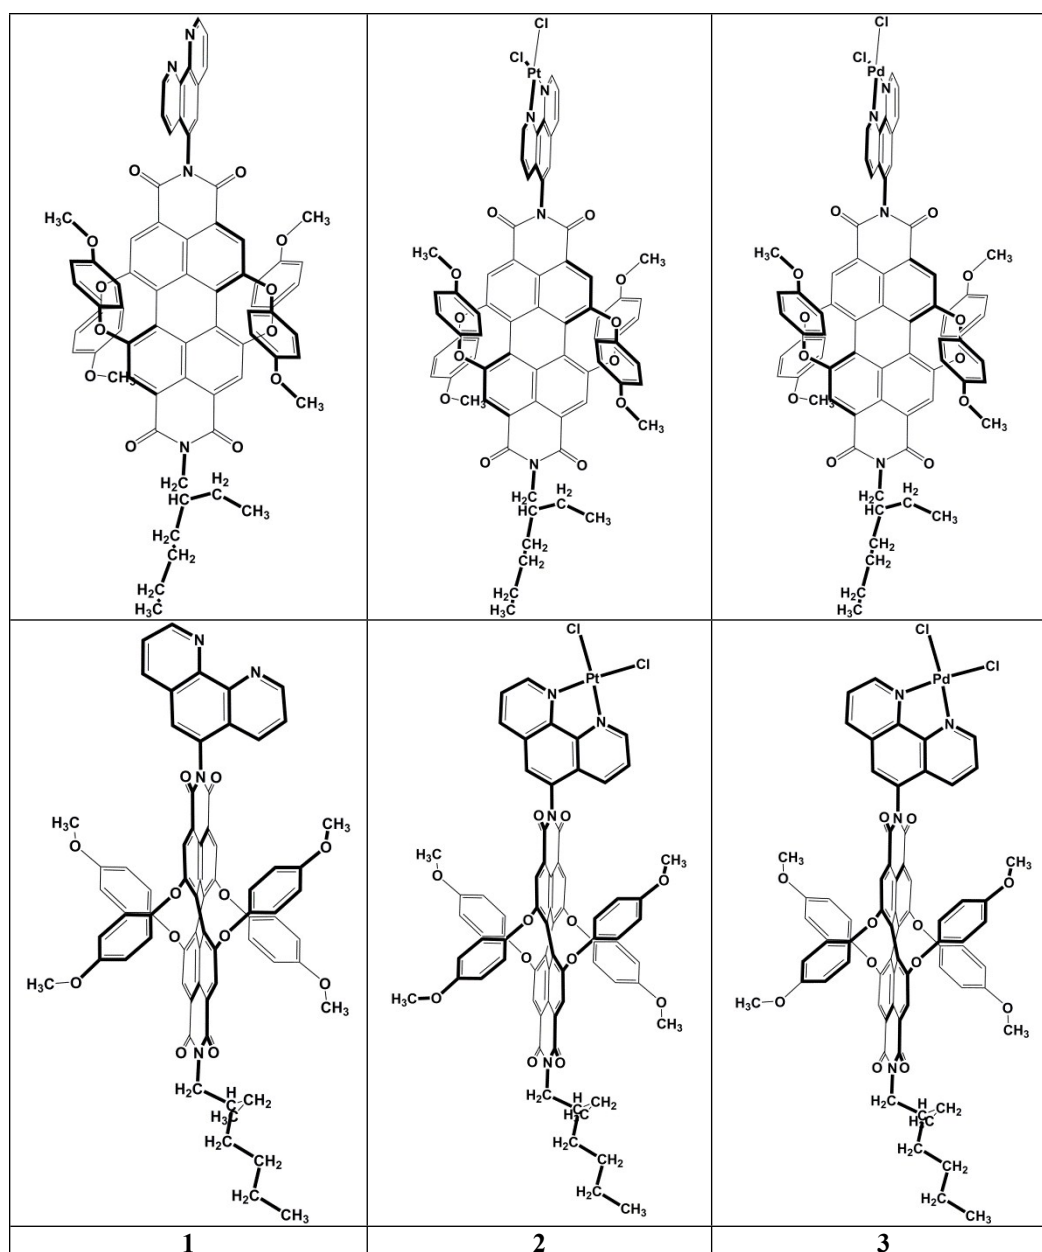

**Figure S32.** Schematic representation of the investigated molecules

**Table S3.** Dipole moments ( $\mu$ , Debye), sum of electronic energies and zero-point energies ( $E_{\text{elec}}+\text{ZPE}$ , Hartree), complexation energies ( $\Delta E_{\text{C}}$ ) and some dihedral angles of studied systems calculated with B3LYP functional using 6-31G(d,p) and LANL2DZ (for metals) basis sets in DCM.

|                   | $\mu$<br>(D) | $E_{\text{elec}}+\text{ZPE}$<br>(Hartree) | $^a\Delta E_{\text{C}}$<br>(kcal/mol) | Dihedral angle<br>(C1C2C3C4) $^\circ$ | Dihedral angle<br>(C5N1C6C7) $^\circ$ |
|-------------------|--------------|-------------------------------------------|---------------------------------------|---------------------------------------|---------------------------------------|
| <b>1</b>          | 5.36         | -3898.118026                              |                                       | -28                                   | 90                                    |
| <b>2</b>          | 21.07        | -4937.737230                              | -25.92                                | -28                                   | 89                                    |
| <b>3</b>          | 21.15        | -4945.310683                              | -15.25                                | -28                                   | 92                                    |
| PtCl <sub>2</sub> | 6.06         | -1039.577881                              |                                       |                                       |                                       |
| PdCl <sub>2</sub> | 6.28         | -1047.168343                              |                                       |                                       |                                       |

$$^a\Delta E_{\text{C}} = [(E+\text{ZPE})_{2/3} - (E+\text{ZPE})_1 - (E+\text{ZPE})_{\text{MCl}_2}]$$

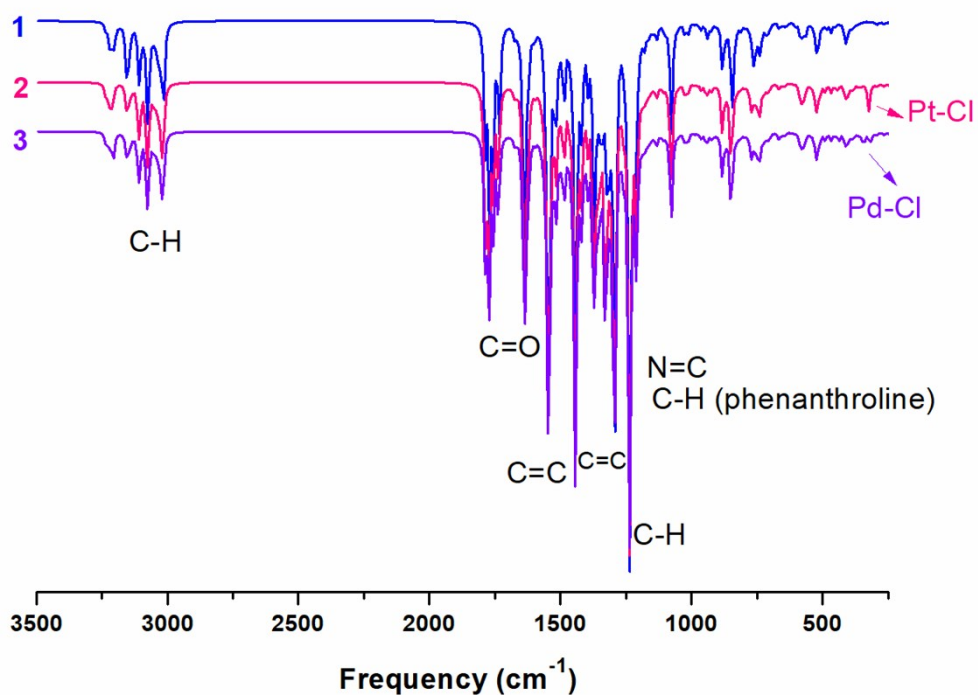

**Figure S33.** Calculated IR spectra of **1**, **2** and **3** in gas phase.

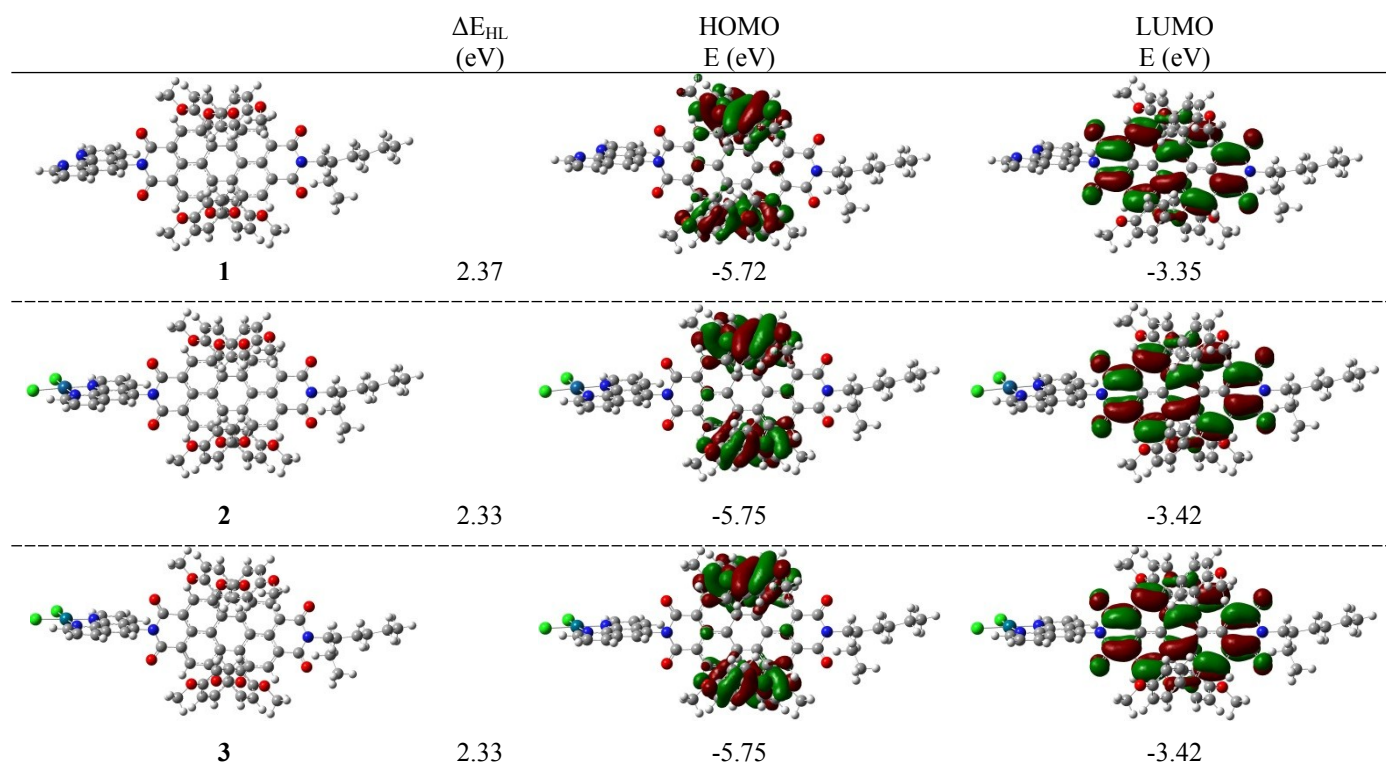

**Figure S34.** Frontier molecular orbitals, their energies, and HOMO-LUMO energy gaps for the investigated molecules calculated at B3LYP functional using 6-31G(d,p) and LANL2DZ (for metals) basis sets in DCM.

**Table S4.** Electronic transitions ( $\lambda_{\text{ex}}$ ), oscillator strengths (f), transition dipole moments ( $\mu_{\text{tr}}$ ), excitation character, molecular orbitals and their % contributions of **1** at B3LYP/6-31G(d,p) level in DCM.

| state           | $\lambda_{\text{ex}}$ (nm) | f      | $\mu_{\text{tr}}$ (D) | Character <sup>a</sup> | Predominant Transitions | %  |
|-----------------|----------------------------|--------|-----------------------|------------------------|-------------------------|----|
| S <sub>1</sub>  | 661                        | 0.0416 | 0.9048                | ICT1                   | H→L                     | 70 |
| S <sub>2</sub>  | 640                        | 0.0019 | 0.0393                | ICT1                   | H-2→L                   | 68 |
| S <sub>3</sub>  | 629                        | 0.0632 | 1.3087                | LE1,ICT1               | H-1→L                   | 62 |
|                 |                            |        |                       | LE1,ICT1               | H-4→L                   | 27 |
| S <sub>4</sub>  | 620                        | 0.0233 | 0.4750                | ICT1                   | H-3→L                   | 70 |
| S <sub>5</sub>  | 543                        | 0.5563 | 9.5352                | LE1,ICT1               | H-4→L                   | 65 |
| S <sub>6</sub>  | 447                        | 0.0002 | 0.0025                | ICT2                   | H-5→L                   | 70 |
| S <sub>7</sub>  | 400                        | 0.0321 | 0.4227                | LE1,ICT3               | H-8→L                   | 62 |
| S <sub>8</sub>  | 398                        | 0.0102 | 0.1332                | ICT1                   | H→L+1                   | 64 |
| S <sub>9</sub>  | 394.2                      | 0.0062 | 0.0803                | ICT2                   | H-6→L                   | 46 |
|                 |                            |        |                       | LE1,ICT1               | H-1→L+1                 | 40 |
| S <sub>10</sub> | 394                        | 0.0355 | 0.4610                | LE1,ICT1               | H-9→L                   | 47 |
|                 |                            |        |                       | ICT2                   | H-6→L                   | 46 |
| S <sub>11</sub> | 393                        | 0.0279 | 0.3608                | LE1,ICT1               | H-1→L+1                 | 45 |
|                 |                            |        |                       | LE1,ICT3               | H-9→L                   | 37 |
| S <sub>12</sub> | 388                        | 0.0089 | 0.1138                | ICT1                   | H-2→L+1                 | 69 |
| S <sub>13</sub> | 386                        | 0.0032 | 0.0401                | ICT1                   | H-10→L                  | 61 |
|                 |                            |        |                       | LE+ICT1                | H-1→L+1                 | 29 |
| S <sub>14</sub> | 382.4                      | 0.0077 | 0.0975                | ICT1                   | H-11→L                  | 65 |
| S <sub>15</sub> | 382                        | 0.0010 | 0.0132                | ICT2                   | H-7→L                   | 66 |
| S <sub>16</sub> | 381                        | 0.0004 | 0.0054                | ICT1                   | H-3→L+1                 | 65 |
| S <sub>17</sub> | 380                        | 0.0025 | 0.0314                | ICT1                   | H-12→L                  | 70 |
| S <sub>18</sub> | 376                        | 0.0158 | 0.1961                | ICT1                   | H-13→L                  | 69 |
| S <sub>19</sub> | 369                        | 0.0004 | 0.0049                | LE1,ICT4               | H-15→L                  | 51 |
|                 |                            |        |                       | LE1,ICT4               | H-16→L                  | 43 |
| S <sub>20</sub> | 366                        | 0.0001 | 0.0009                | LE1,ICT1               | H-4→L+1                 | 66 |

<sup>a</sup>LE1: local excitation of perylene; ICT1: intramolecular charge-transfer from phenyl rings to perylene moiety; ICT2: intramolecular charge-transfer from phenanthroline to perylene moiety; ICT3: intramolecular charge-transfer from perylene to phenyl rings; ICT4: intramolecular charge-transfer from C=O, N and alkyl chain of perylene side to perylene.

**Table S5.** Electronic transitions ( $\lambda_{\text{ex}}$ ), oscillator strengths (f), transition dipole moments ( $\mu_{\text{tr}}$ ), excitation character, molecular orbitals and their % contributions of **2** calculated at B3LYP functional using 6-31G(d,p) and LANL2DZ (for metals) basis sets in DCM.

| state           | $\lambda_{\text{ex}}$ (nm) | f      | $\mu_{\text{tr}}$ (D) | Character <sup>a</sup> | Predominant Transitions | %  |
|-----------------|----------------------------|--------|-----------------------|------------------------|-------------------------|----|
| S <sub>1</sub>  | 679                        | 0.0581 | 1.2975                | ICT1                   | H→L                     | 70 |
| S <sub>2</sub>  | 653                        | 0.0119 | 0.2549                | ICT1                   | H-2→L                   | 60 |
|                 |                            |        |                       | LE1,ICT1               | H-1→L                   | 37 |
| S <sub>3</sub>  | 646                        | 0.1038 | 2.2068                | LE1,ICT1               | H-1→L                   | 57 |
|                 |                            |        |                       | ICT1                   | H-2→L                   | 37 |
| S <sub>4</sub>  | 634                        | 0.0335 | 0.6981                | ICT1                   | H-3→L                   | 70 |
| S <sub>5</sub>  | 563                        | 0.6902 | 12.7975               | LE1,ICT1               | H-4→L                   | 68 |
| S <sub>6</sub>  | 453                        | 0.0001 | 0.0014                | LMCT1,ICT5             | H→L+1                   | 62 |
| S <sub>7</sub>  | 448                        | 0.0002 | 0.0023                | LMCT2,ICT5             | H-1→L+1                 | 61 |
| S <sub>8</sub>  | 439                        | 0.0000 | 0.0006                | LMCT1,ICT5             | H-2→L+1                 | 66 |
| S <sub>9</sub>  | 436                        | 0.0000 | 0.0003                | MLCT1                  | H-5→L                   | 71 |
| S <sub>10</sub> | 431                        | 0.0001 | 0.0011                | LMCT1,ICT5             | H-3→L+1                 | 69 |
| S <sub>11</sub> | 425                        | 0.0001 | 0.0013                | LMCT1,ICT5             | H→L+2                   | 65 |
| S <sub>12</sub> | 423.3                      | 0.0002 | 0.0027                | LMCT2,ICT5             | H-1→L+2                 | 62 |
| S <sub>13</sub> | 423                        | 0.0001 | 0.0011                | MLCT1,ICT2             | H-6→L                   | 70 |
| S <sub>14</sub> | 418                        | 0.0034 | 0.0463                | LE2,MLCT3              | H-5→L+1                 | 66 |
| S <sub>15</sub> | 414                        | 0.0006 | 0.0084                | LMCT2,ICT5             | H-4→L+1                 | 65 |
| S <sub>16</sub> | 413                        | 0.0000 | 0.0004                | ICT5                   | H-2→L+2                 | 63 |
| S <sub>17</sub> | 407                        | 0.0673 | 0.9020                | LE1,ICT1               | H-9→L                   | 67 |
| S <sub>18</sub> | 406                        | 0.0004 | 0.0047                | ICT5                   | H-3→L+2                 | 69 |
| S <sub>19</sub> | 405                        | 0.0001 | 0.0010                | MLCT2                  | H-7→L                   | 70 |
| S <sub>20</sub> | 404                        | 0.0036 | 0.0479                | LE2,MLCT3              | H-7→L+1                 | 65 |
| S <sub>40</sub> | 363                        | 0.1946 | 2.3306                | LE2,MLCT3              | H-5→L+1                 | 56 |

<sup>a</sup>LE1: local excitation of perylene; LE2: local excitation of Pt; LMCT1: charge transfer from phenyl units to Pt; LMCT2: charge transfer from perylene to Pt; MLCT1: charge transfer from Pt-Cl2 to perylene; MLCT2: charge transfer from Pt to perylene; MLCT3: charge transfer from Pt-Cl2 to phenanthroline; ICT1: intramolecular charge-transfer from phenyl rings to perylene moiety; ICT5: intramolecular charge-transfer from phenyl rings to phenanthroline.

**Table S6.** Electronic transitions ( $\lambda_{\text{ex}}$ ), oscillator strengths (f), transition dipole moments ( $\mu_{\text{tr}}$ ), excitation character, molecular orbitals and their % contributions of **3** calculated at B3LYP functional using 6-31G(d,p) and LANL2DZ (for metals) basis sets in DCM.

| state           | $\lambda_{\text{ex}}$ (nm) | f      | $\mu_{\text{tr}}$ (D) | Character <sup>a</sup> | Predominant Transitions | %  |
|-----------------|----------------------------|--------|-----------------------|------------------------|-------------------------|----|
| S <sub>1</sub>  | 678.5                      | 0.0590 | 1.3178                | ICT1                   | H→L                     | 71 |
| S <sub>2</sub>  | 653                        | 0.0126 | 0.2712                | ICT1                   | H-2→L                   | 60 |
|                 |                            |        |                       | LE1,ICT1               | H-1→L                   | 37 |
| S <sub>3</sub>  | 646                        | 0.1036 | 2.2028                | LE+ICT1                | H-1→L                   | 57 |
|                 |                            |        |                       | ICT1                   | H-2→L                   | 37 |
| S <sub>4</sub>  | 634                        | 0.0334 | 0.6962                | ICT1                   | H-3→L                   | 70 |
| S <sub>5</sub>  | 563                        | 0.6871 | 12.738                | LE1,ICT1               | H-4→L                   | 68 |
| S <sub>6</sub>  | 486                        | 0.0002 | 0.0025                | LE2,MLCT3              | H-5→L+1                 | 66 |
| S <sub>7</sub>  | 485                        | 0.0014 | 0.0001                | LE2,MLCT3              | H-8→L+1                 | 62 |
| S <sub>8</sub>  | 461                        | 0.0000 | 0.0001                | LE2,MLCT3              | H-6→L+1                 | 66 |
| S <sub>9</sub>  | 458                        | 0.0016 | 0.0243                | LE2,MLCT3              | H-13→L+1                | 64 |
| S <sub>10</sub> | 452                        | 0.0000 | 0.0001                | LMCT1,ICT5             | H→L+1                   | 67 |
| S <sub>11</sub> | 447                        | 0.0000 | 0.0001                | LMCT2,ICT5             | H-1→L+1                 | 66 |
| S <sub>12</sub> | 446                        | 0.0001 | 0.0014                | ICT5                   | H→L+2                   | 62 |
| S <sub>13</sub> | 442                        | 0.0001 | 0.0018                | LMCT2,ICT5             | H-1→L+2                 | 61 |
| S <sub>14</sub> | 440                        | 0.0000 | 0.0002                | LMCT1,ICT5             | H-2→L+1                 | 68 |
| S <sub>15</sub> | 433                        | 0.0000 | 0.0007                | ICT5                   | H-2→L+2                 | 66 |
| S <sub>16</sub> | 432                        | 0.0000 | 0.0002                | LMCT1,ICT5             | H-3→L+1                 | 69 |
| S <sub>17</sub> | 425                        | 0.0001 | 0.0011                | ICT5                   | H-3→L+2                 | 69 |
| S <sub>18</sub> | 419                        | 0.0001 | 0.0018                | ICT5                   | H→L+2                   | 65 |
| S <sub>19</sub> | 418                        | 0.0002 | 0.0030                | LMCT2,ICT5             | H-1→L+2                 | 62 |
| S <sub>20</sub> | 413                        | 0.0000 | 0.0002                | LMCT2,ICT5             | H-4→L+1                 | 70 |

<sup>a</sup>LE1: local excitation of perylene; LE2: local excitation of Pd; LMCT1: charge transfer from phenyl units to Pd; LMCT2: charge transfer from perylene to Pd; MLCT1: charge transfer from Pd-Cl2 to perylene; MLCT2: charge transfer from Pd to perylene; MLCT3: charge transfer from Pd-Cl2 to phenanthroline; ICT1: intramolecular charge-transfer from phenyl rings to perylene moiety; ICT5: intramolecular charge-transfer from phenyl rings to phenanthroline.



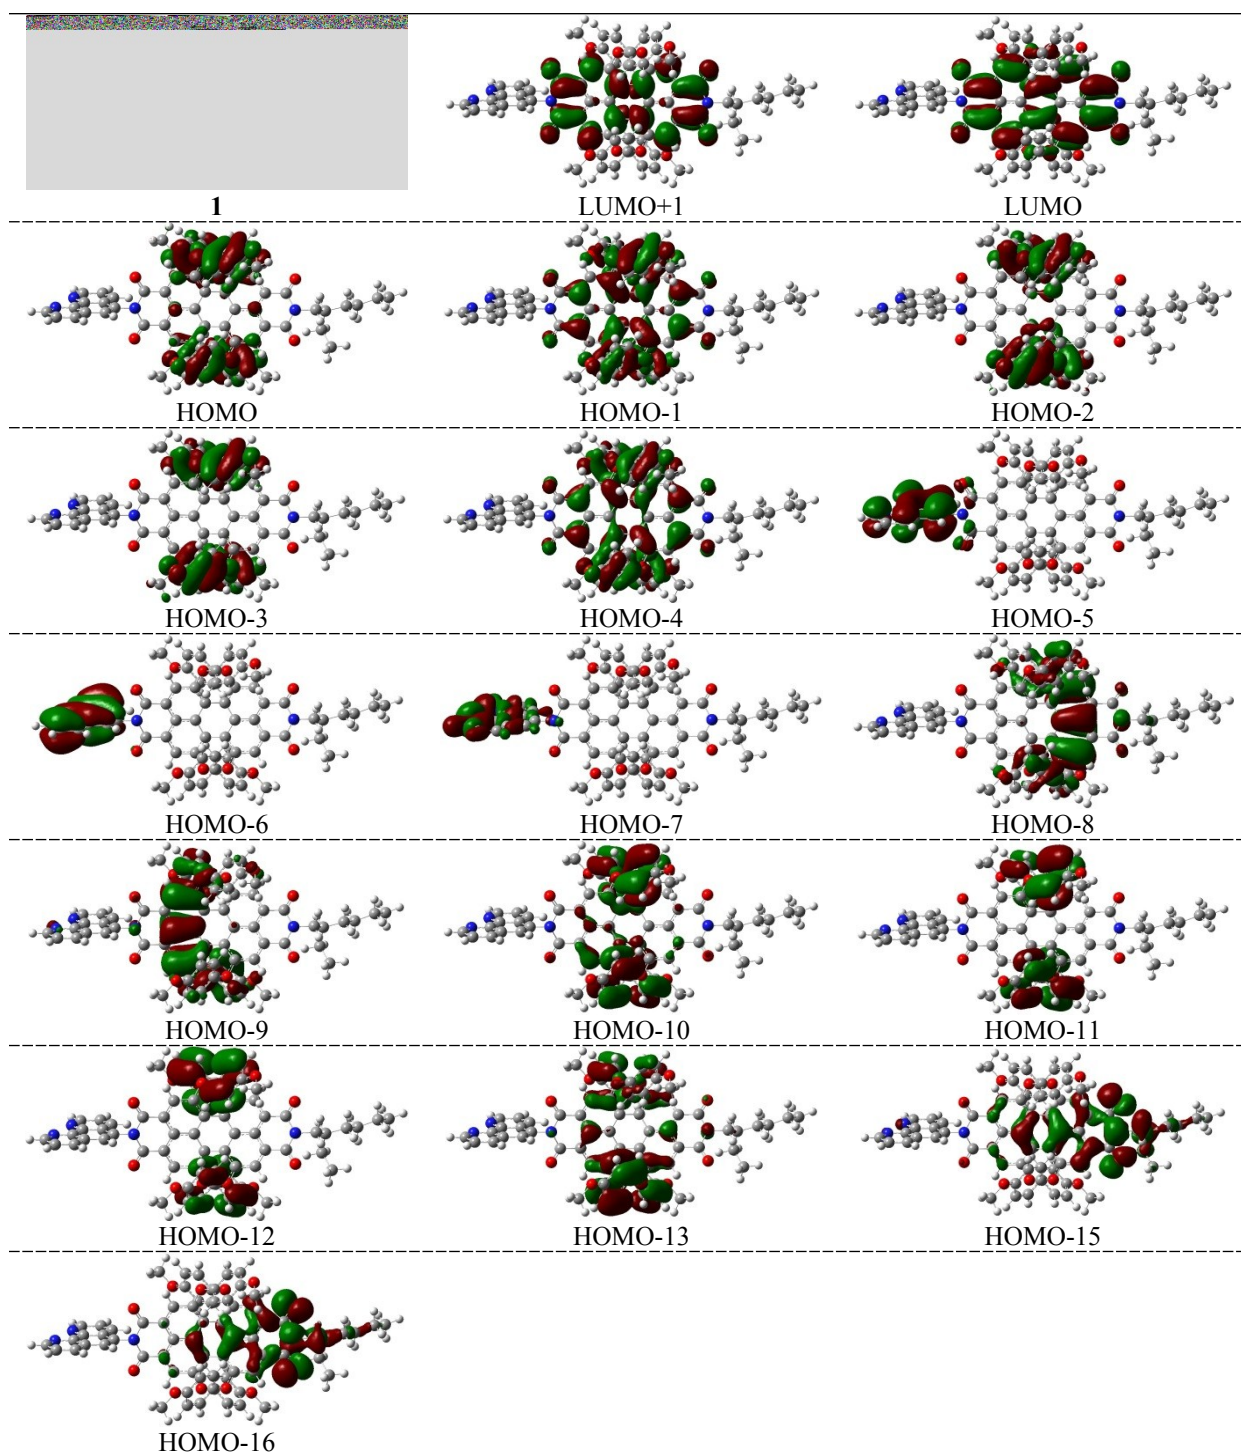

Figure S34. Selected molecular orbitals of **1** in DCM



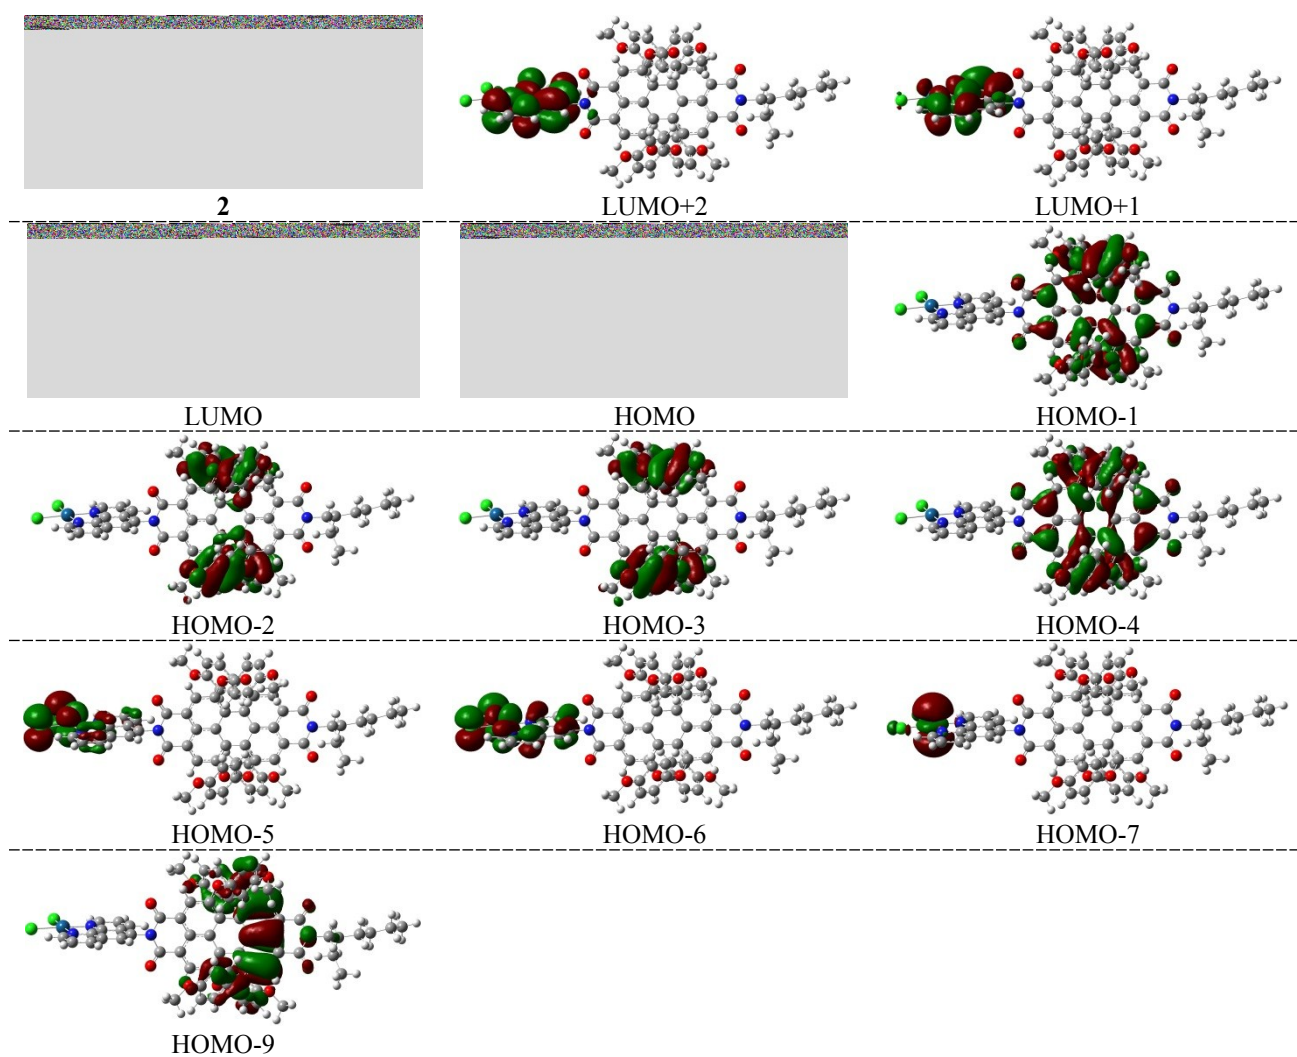

Figure S35. Some molecular orbitals of **2** in DCM.

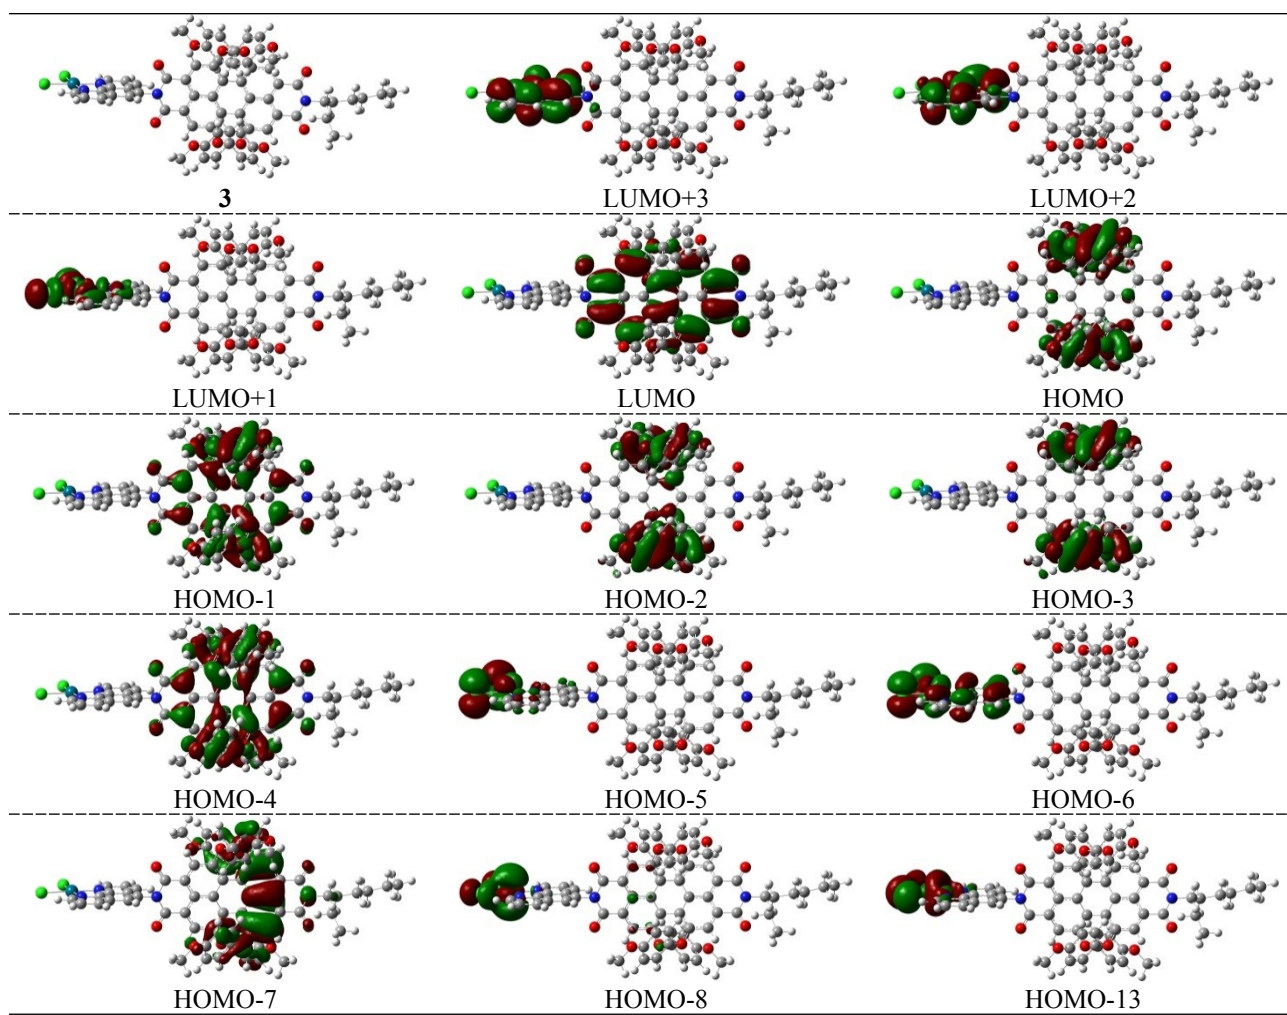

S36. Selected molecular orbitals of **3** in DCM.

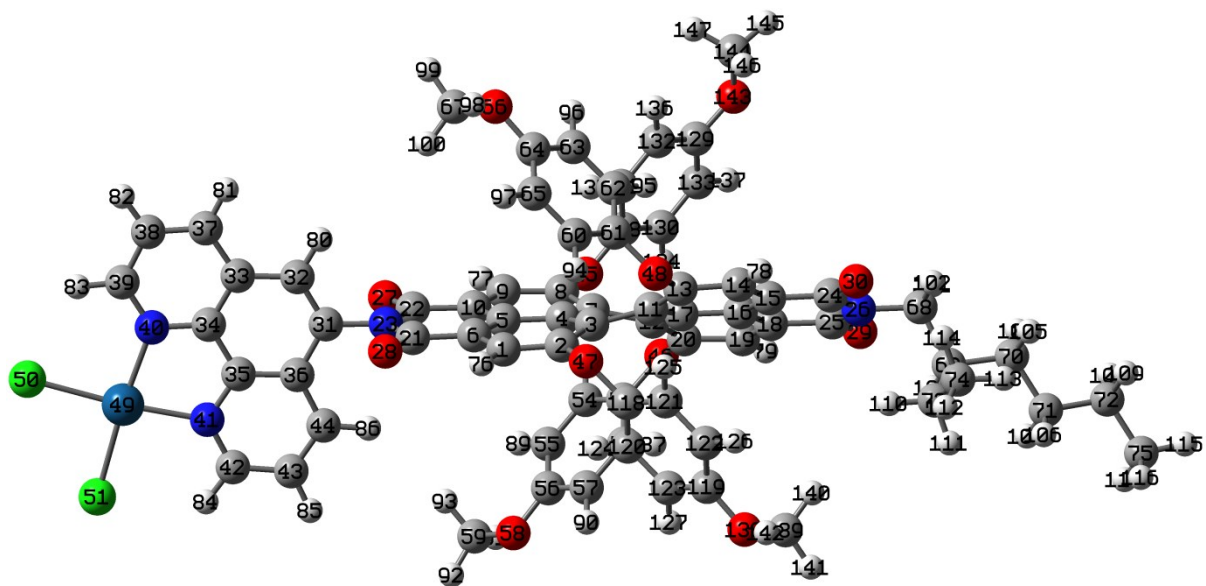

Table S7. Charge distribution in compound 2 in DCM

|         | Mulliken charges | NBO charges |
|---------|------------------|-------------|
| Pt (49) | 0.264            | 0.378       |
| Cl (50) | -0.333           | -0.477      |
| Cl (51) | -0.334           | -0.478      |
| N (40)  | -0.647           | -0.415      |
| N (41)  | -0.643           | -0.415      |
| C (42)  | 0.130            | 0.087       |
| C (43)  | -0.111           | -0.252      |
| O (28)  | -0.484           | -0.639      |
| C (31)  | 0.203            | 0.199       |
| N (23)  | -0.621           | -0.508      |
| C (21)  | 0.487            | 0.695       |
| C (22)  | 0.487            | 0.694       |
| O (27)  | -0.485           | -0.640      |
| O (28)  | -0.484           | -0.639      |
| O ( 58) | -0.486           | -0.502      |

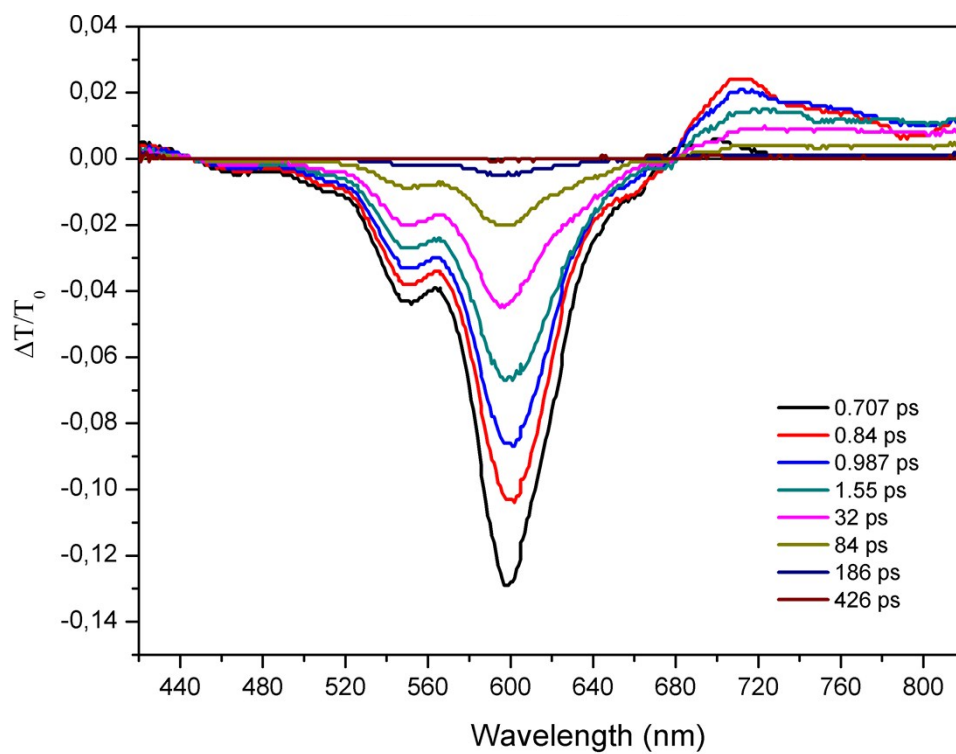

**Figure S37.** Ultrafast transient absorption spectra of **2** with different time delays at excited 590 nm femtosecond pulsed laser

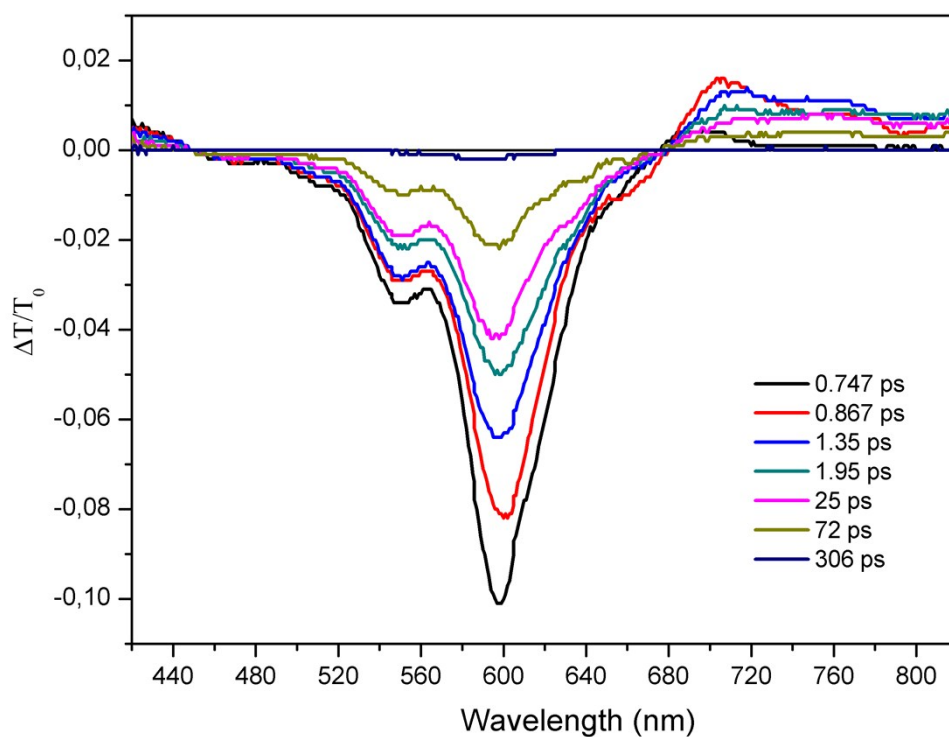

**Figure S38.** Ultrafast transient absorption spectra of **3** with different time delays at excited 590 nm femtosecond pulsed laser
